# Supplementary material for: Blunted Positive Affect Bridges Childhood Adversity and Psychopathology: A Meta-Analytic Structural Equation Modeling Study
Source: Research Square preprint supplement (doi:10.21203/rs.3.rs-6064566/v1), 2025-03-05
Supplement: Supplementary file 1 [file fddbb3a42cdad7f5271d5899.docx]

**Supplementary Material**

**Search string**

TITLE or ABSTRACT=((child* AND (maltreatment OR abuse OR trauma OR adversity OR (adverse event*) OR (adverse life event*) OR (stressful event*) OR (early life stress))) AND ((positive AND (emotion OR affect OR feeling OR mood)) OR (subjective AND ((well-being) OR wellbeing)) OR happiness OR joy OR pride or gratitude OR pleasure OR awe OR contentment))

**Supplementary Table 1**

Description of studies included in the meta-analysis

| Study | Country | *N* | Study design | Type of samplea | % female | Mean age | ACEs measure | Types of ACEs (timeframe) | PA type | PA measure time frame | PA measure | Type of PA measure | Psychopathology measure | Dimension of psychopathology |
| --- | --- | --- | --- | --- | --- | --- | --- | --- | --- | --- | --- | --- | --- | --- |
| Alessandri & Lewis, 1996 1 | USA | 84 | cross-sectional | non-clinical | 50 | 4.37 | MI | Emotional mistreatment; physical abuse; sexual abuse; neglect (current) | Pride | present | PCS | behavior | not applicable | not applicable |
| Alkhalaf, 2015 2 | Saudi Arabia | 293 | cross-sectional | non-clinical | 36.87 | 27.20 | ASPQ | Verbal abuse; physical abuse (between ages 6 and 18) | PA | general | PANAS-P | subjective | not applicable | not applicable |
| Arslan & Yıldırım, 2022 3 | Turkey | 791 | cross-sectional | non-clinical | 45.9 | 16.35 | PMQ | Childhood terrorizing; childhood corrupting; childhood rejecting; childhood denying emotional responsiveness (lifetime) | PA | general | PANAS-P | subjective | not applicable | not applicable |
| Arslan, 2017 4 | Turkey | 825 | cross-sectional | non-clinical | 53.8 | 16.50 | PMQ | Childhood terrorizing; childhood corrupting; childhood rejecting; childhood denying emotional responsiveness (lifetime) | PA | general | PANAS-P | subjective | not applicable | not applicable |
| Baugher et al, 2024 5 | USA | 52 | cross-sectional | mixed | 7,7 | 38 | ACE-IQ | Physical abuse; emotional abuse; sexual abuse; household substance abuse; incarcerated family member; household mental illness; domestic violence; parental separation/divorce; emotional neglect; physical neglect; bullying; community violence; collective violence (before age 18) | PA | present | Noldus FaceReader | behavior | not applicable | not applicable |
| Bendezú et al, 2022 6 | USA | 237 | cross-sectional | mixed | 100 | 13.98 | CTQ-SF | Emotional abuse; physical abuse; sexual abuse; emotional neglect; physical neglect (lifetime) | PA | longer periods of time | PANAS-C-P | subjective | BDI-Y; K-SADS–PL (PASI subscales) | Depressive symptoms; passive or active suicidal ideationc |
| Bonano et al, 2002 7 | USA | 93 | cross-sectional | non-clinical | 100 | 18.20 | Official records; CAHQ; CTI | Childhood sexual abuse (childhood and adolescence) | PA | present | EMFACS | behavior | not applicable | not applicable |
| Bradley et al, 2013 8 | USA | 519 | cross-sectional | non-clinical | 69.7 | 34.84 | CTQ | Emotional abuse; physical abuse; sexual abuse; emotional neglect; physical neglect (childhood and adolescence) | PA | not reported | PANAS-P | subjective | MPSS | PTSD symptoms |
| Brick et al, 2021 9 | USA | 133 | repeated | clinical | 57.9 | 40.93 | CTQ-SF | Emotional abuse; physical abuse; sexual abuse (childhood and adolescence) | PA | present | PANAS-P | subjective | not applicable | not applicable |
| Brodski & Hutz, 2012 10 | Brazil | 293 | cross-sectional | non-clinical | 65.4 | 20.7 | CTQ-SF | Emotional abuse (childhood and adolescence) | PA | not reported | PANAS-P | subjective | not applicable | not applicable |
| Brunton & Dryer, 2024 11 | Australia | 491 | cross-sectional | non-clinical | 100 | 37.15 | ACES | Emotional abuse; physical abuse; sexual abuse; emotional neglect; physical neglect; living with someone with substance abuse, mental illness, or incarceration; exposure to domestic violence (before age 18) | PA | not reported | PANAS-SF-P | subjective | not applicable | not applicable |
| Burton et al, 2018 12 | USA | 314 | cross-sectional | non-clinical | 50.6 | 12.5 | APQ; PI | Poor monitoring; inconsistent discipline; corporal punishment; parent focused parentification; sibling focused parentification (lifetime) | PA | not reported | PANAS-C-P | subjective | not applicable | not applicable |
| Carlton et al, 2021 13 | USA | 527 | cross-sectional | non-clinical | 51 | 52.23 | CTQ-SF | Emotional abuse; physical abuse; sexual abuse; emotional neglect; physical neglect (childhood and adolescence) | PA | present | PANAS-P | subjective | SAS | Social anxiety |
| Cavazzoni et al, 2022 14 | Palestine | 250 | cross-sectional | non-clinical | 68 | 10.27 | Ad-hoc questions | Refugee children | PA | not reported | PANAS-C-P | subjective | CRIES-13 | PTSD symptoms |
| Cipriano et al, 2011 15 | USA | 92 | cross-sectional | non-clinical | 53.3 | 3.75 | MCS (official records); CTS | Emotional abuse; physical abuse; emotional neglect; physical neglect; exposure to family violence (lifetime) | PA | present | OCTS-PA | behavior | SDQ | Emotional problems |
| Cohen et al, 2022 16 | USA | 462 | longitudinal | non-clinical | 75.5 | 19.45 | CTQ-SF; MNBS | Emotional abuse; physical abuse; emotional support neglect; physical neglect; monitoring/supervision neglect; educational support neglect (childhood and adolescence) | Anticipatory PA | general | TEPS | subjective | PCL-5-(anhedonia subscale; negative affect subscale); CESD-20 (anhedonia; negative mood subscales) | PTSD symptoms; depressive symptoms |
| Corcoran & McNulty, 2018 17 | Ireland | 190 | cross-sectional | non-clinical | 76.31 | 22.02 | ACES | Emotional abuse; physical abuse; sexual abuse; emotional neglect; physical neglect; household dysfunction (before age 18) | PA | not reported | PANAS-P | subjective | DASS-21 | Depressive, anxiety, and stress symptoms |
| Crandall et al, 2019 18 | USA | 246 | cross-sectional | non-clinical | 41.87 | 34.55 | BRFSS ACE module | Emotional abuse; physical abuse; sexual abuse; household dysfunction (before age 18) | Gratitude | general | GQ-6 | subjective | MADRS | Depressive symptoms |
| de Abreu et al, 2023 19 | Luxembourg | 264 | cross-sectional | mixed | 53 | 14.58 | EAT-Q | Physical abuse; emotional abuse; sexual abuse; household substance abuse; incarcerated family member; household mental illness; domestic violence; parental separation/divorce; emotional neglect; physical neglect; bullying; community violence; collective violence (childhood and adolescence) | SWB | general | WHO-5 WBI | subjective | SMFQ; SCARED (GAD subscale); SDQ | Depressive symptoms; anxiety symptoms; internalizing symptoms; externalizing symptoms |
| DePierro et al, 2018 (study 1) 20 | USA | 286 | cross-sectional | non-clinical | 52 | 32.06 | CTQ-SF | Emotional abuse; physical abuse; sexual abuse; emotional neglect; physical neglect (childhood and adolescence) | positive emotionality | general | HDIS-PE | subjective | BSI-DEP; PCL-C | Depressive symptoms; PTSD symptoms |
| DePierro et al, 2018 (study 2) 20 | USA | 286 | cross-sectional | non-clinical | 66.1 | 32.42 | CTQ-SF | Emotional abuse; physical abuse; sexual abuse; emotional neglect; physical neglect (childhood and adolescence) | Positive emotionality | general | HDIS-PE | subjective | BSI-DEP; PCL-C | Depressive symptoms; PTSD symptoms |
| Dokuz et al, 2022 21 | Turkey | 41 | repeated | clinical | 17.1 | 32.76 | CTQ-SF | Emotional abuse; physical abuse; sexual abuse; emotional neglect; physical neglect (childhood and adolescence) | PA | present | Ad-hoc questionnaire | subjective | not applicable | not applicable |
| Drukker et al, 2020 22 | Netherlands | 24 | repeated | clinical | 66.7 | 36.8 | CTQ-SF | Emotional abuse; physical abuse; sexual abuse; emotional neglect; physical neglect (childhood and adolescence) | PA | present | Ad-hoc questions | subjective | not applicable | not applicable |
| Erato et al, 2024 23 | USA | 171 | cross-sectional | non-clinical | 100 | 25.35 | ACES | Emotional abuse; physical abuse; sexual abuse; emotional neglect; physical neglect; household dysfunction (before age 18) | Happiness | longer periods of time | Ad-hoc questionnaire | subjective | not applicable | not applicable |
| Etter et al, 2013 24 | USA | 173 | cross-sectional | clinical | 52 | 37.7 | CTS based interview | Physical abuse; sexual abuse (childhood) | PA | general | Ad-hoc interview | subjective | SCL-90-R; SI-SDB; SI-PTSD | Depressive symptoms; self-destructive behaviorsd; PTSD symptoms |
| Fillingim & Edwards, 2005 25 | USA | 110 | cross-sectional | non-clinical | 100 | 20.8 | SPAHQ | Physical abuse; sexual abuse (childhood and adolescence) | PA | present | POMS-PA | subjective | not applicable | not applicable |
| Fitzgerald & Berthiaume, 2021 26 | USA | 1104 | prospective | non-clinical | 50.3 | 63.64 | Ad-hoc questions | Emotional abuse; physical abuse (childhood and adolescence) | PA | longer periods of time | Ad-hoc questionnaire | subjective | not applicable | not applicable |
| Fitzgerald & Esplin, 2022 27 | USA | 1345 | cross-sectional | non-clinical | 45.7 | 50.42 | CTS; Ad-hoc item | Emotional abuse; physical abuse; alcoholic parent (childhood and adolescence) | PA | longer periods of time | Ad-hoc questionnaire | subjective | not applicable | not applicable |
| Frewen et al, 2012 28 | Canada | 99 | cross-sectional | non-clinical | 61.61 | 20.5 | CTQ-SF | Emotional abuse; sexual abuse (childhood and adolescence) | Joy; Positive emotionality | general | M-FCPCS (joy); HDIS-PE | subjective | not applicable | not applicable |
| Galea et al, 2007 29 | Malta | 312 | cross-sectional | non-clinical | 68.6 | 20.45 | CTQ-SF | Emotional abuse; physical abuse; sexual abuse; emotional neglect; physical neglect (childhood and adolescence) | PA | longer periods of time | ABS | subjective | not applicable | not applicable |
| George et al, 2014 30 | USA | 436 | cross-sectional | non-clinical | 100 | 24.8 | Hulme’s CSA questionnaire | Sexual abuse (before age 14) | PA | present | PANAS-P | subjective | not applicable | not applicable |
| Gratz, 2006 31 | USA | 249 | cross-sectional | non-clinical | 100 | 23.29 | API; PBI | Sexual abuse; physical abuse (childhood); parental neglect and overprotection (before age 16) | PA | general | AIM | subjective | DSHI | Self-harme |
| Greene et al, 2021 32 | USA | 80 | cross-sectional | non-clinical | 100 | 29.8 | CTQ-SF | Emotional abuse; physical abuse; sexual abuse; emotional neglect; physical neglect (childhood and adolescence) | PA | present | P-COS | behavior | PCL-C; PROMIS-SF-ED | PTSD symptoms; depressive symptoms; anxiety symptoms |
| Grusnick et al, 2020 33 | USA | 6323 | cross-sectional | non-clinical | 52.51 | 46 | Ad-hoc questionnaire (based on ACES) | Emotional abuse; physical abuse; household dysfunction; financial strain (before age 18) | PA | longer periods of time | Ad-hoc questionnaire | subjective | not applicable | not applicable |
| Guhn et al, 2018 (study 1) 34 | Germany | 30 | cross-sectional | mixed | 53.3 | 50.3 | CTQ-SF | Emotional abuse; physical abuse; sexual abuse; emotional neglect; physical neglect (childhood and adolescence) | PA | present | PANAS-P | subjective | HDRS | Depressive symptoms |
| Guhn et al, 2018 (study 2) 34 | Germany | 30 | cross-sectional | mixed | 53.3 | 50.3 | CTQ-SF | Emotional abuse; physical abuse; sexual abuse; emotional neglect; physical neglect (childhood and adolescence) | PA | present | PANAS-P | subjective | HDRS; BDI-II | Depressive symptoms |
| Han et al, 2023 35 | China | 1745 | cross-sectional | non-clinical | 46.3 | 9-17 | CTQ-SF | Emotional abuse; physical abuse; sexual abuse; emotional neglect; physical neglect (lifetime) | Pleasure | not reported | SHAPS | subjective | PHQ-9 | Depressive symptoms |
| Hasmi et al, 2017 36 | Belgium | 430 | repeated | non-clinical | 60 | 17.6 | CTQ-SF | Emotional abuse; physical abuse; sexual abuse; emotional neglect; physical neglect (childhood and adolescence) | Cheerfulness | present | Ad-hoc questions | subjective | not applicable | not applicable |
| Hauber et al, 2021 37 | Germany | 1825 | cross-sectional | non-clinical | 62.6 | 85.1 | Ad-hoc questions | childhood war trauma (during or after the war) | PA | longer periods of time | PANAS-P | subjective | DIA-S4 | Depressive symptoms |
| Hautle et al, 2023b 38 | Switzerland | 80 | cross-sectional | mixed | 63.75 | 32.92 | CTQ-SF | Emotional abuse; physical abuse; sexual abuse; emotional neglect; physical neglect (childhood and adolescence) | PA | present | FaceReader™ coding system | behavior | BDI-II | Depressive symptoms |
| Heshmati et al, 2021 39 | Iran | 250 | cross-sectional | non-clinical | 60.8 | 24.72 | CASRS | Emotional abuse; physical abuse; sexual abuse; neglect (childhood) | PA | not reported | PANAS-P | subjective | not applicable | not applicable |
| Holzman et al, 2018 40 | USA | 150 | longitudinal | non-clinical | 54 | 0.75 | Ad-hoc questions; SCID-IV | Low SES; history or concurrent maternal depression | Rapid approach, excitement; positive anticipation of pleasurable activities | present | IBQ-R | behavior | not applicable | not applicable |
| Iffland et al, 2014 41 | Germany | 74 | cross-sectional | mixed | 79.7 | 24.41 | CTQ-SF; FBS | Emotional abuse; physical abuse; sexual abuse; emotional neglect; physical neglect; peer victimization (childhood and adolescence) | PA | present | PANAS-P | subjective | BDI-II; BSI; SPS; SIAS; MINI | Depressive symptoms; general psychopathology; social anxiety |
| Infurna et al, 2015 42 | USA | 191 | repeated | non-clinical | 54 | 53.48 | CTQ (10 items) | Emotional abuse; physical abuse; sexual abuse (childhood and adolescence) | PA | longer periods of time | PANAS-P | subjective | not applicable | not applicable |
| Infurna et al, 2023 43 | USA | 200 | repeated | non-clinical | 100 | 61.16 | ACEs questionnaire (11 items from BRFSS ACE module & 3 items from ACE-IQ) | Emotional abuse; physical abuse; sexual abuse; household dysfunction; exposure to neighborhood violence, peer bullying, and parental death (before age 18) | PA | present | PANAS-P | subjective | not applicable | not applicable |
| Ion et al, 2023 44 | Romania | 118 | repeated | non-clinical | 82.76 | 19.65 | CTQ-SF | Emotional abuse; physical abuse; sexual abuse; emotional neglect; physical neglect (childhood and adolescence) | PA | present | PANAS-P | subjective | not applicable | not applicable |
| Jackson et al, 1990 45 | USA | 40 | cross-sectional | non-clinical | 100 | 22.54 | Resick modified interview | Sexual abuse (before age 18) | PA | longer periods of time | ABS-PA | subjective | BDI | Depressive symptoms |
| Jeon & Bae, 2022 46 | South Korea | 260 | cross-sectional | non-clinical | 50 | 16 | CTQ-SF | Emotional abuse; physical abuse; sexual abuse; emotional neglect; physical neglect (childhood and adolescence) | PA | not reported | PANAS-P | subjective | not applicable | not applicable |
| Jerud et al, 2014 47 | USA | 200 | cross-sectional | clinical | 75.5 | not reported | Ad-hoc questions | Physical abuse; sexual abuse (before age 13) | PA | general | PANAS-P | subjective | SCID-IV | PTSD |
| Julian et al, 2019 48 | USA | 100 | cross-sectional | non-clinical | 100 | 30.21 | CTQ-SF; TMMI; SCID-IV | Emotional abuse; physical abuse; sexual abuse; emotional neglect; physical neglect (before age 18) | PA | present | PIIS; MIPCS | behavior | not applicable | not applicable |
| Jung, 2018 49 | USA | 1653 | longitudinal | non-clinical | 54 | 47.35 | Ad-hoc questions | Emotional abuse; physical abuse; family instability; financial strain (childhood and adolescence) | PA | longer periods of time | Ad-hoc questionnaire | subjective | not applicable | not applicable |
| Kelifa et al, 2021 50 | Eritrea | 507 | cross-sectional | non-clinical | 49.51 | 19.69 | ACE-IQ | Physical abuse; emotional abuse; sexual abuse; household substance abuse; incarcerated family member; household mental illness; domestic violence; parental separation/divorce; emotional neglect; physical neglect; bullying; community violence; collective violence (before age 18) | SWB | longer periods of time | WHO-5 WBI | subjective | SRQ-20 | Depressive symptoms |
| Kim et al, 2023 51 | South Korea | 2214 | cross-sectional | non-clinical | 35.4 | 16.07 | Ad-hoc questionnaire | Emotional abuse; physical abuse; sexual abuse; emotional neglect; physical neglect; parental substance abuse; parental incarceration; parental divorce; parental death; domestic violence (past year) | Happiness | longer periods of time | Ad-hoc question | subjective | Ad-hoc questionnaire | Risk taking behaviorf |
| Koening et al, 2000 52 | USA | 89 | cross-sectional | non-clinical | 81 | 3.5 | Official records; CM checklist (Giovannoni & Becerra) | Emotional abuse; physical abuse; sexual abuse; neglect (lifetime) | Joy | present | Ad-hoc maternal and child affect coding system | behavior | not applicable | not applicable |
| Kong et al, 2023 53 | China | 240 | repeated | non-clinical | 90.4 | 19.02 | CTQ-SF | Emotional abuse; physical abuse; sexual abuse; emotional neglect; physical neglect (before age 16) | Gratitude | present | GAC | subjective | not applicable | not applicable |
| Krijnen et al, 2023 54 | Netherlands | 2762 | cross-sectional | non-clinical | 48.6 | 3.6 | PELQ | Death of a close family memeber due to COVID (during the pandemic) | PA | general | PROMIS EC | subjective | PROMIS-EC | Anger/Irritability; depressive symptoms;  anxiety symptoms |
| Kumar et al, 2023 55 | India | 571 | cross-sectional | non-clinical | 42.2 | highschool | Ad-hoc questionnaire | Physical abuse and punishment; sexual abuse; emotional abuse; emotional neglect (childhood) | Happiness | present | Ad-hoc questionnaire | subjective | DAYS | Depressive symptoms; anxiety symptoms |
| Kuzminskaite et al, 2024 56 | Netherlands | 346 | repeated | mixed | 67.05 | 49.25 | CTI | Emotional neglect; emotional abuse; physical abuse; sexual abuse (before age 16) | PA | longer periods of time | Ad-hoc questionnaire | subjective | CIDI | Current anxiety or depression |
| Kwok et al, 2024 57 | China | 293 | prospective | mixed | 75.1 | 20.68 | ACE-IQ | Emotional neglect; physical neglect; emotional abuse; physical abuse; experienced bullying (before age 18) | Happiness | present | MHC-SF | subjective | MHC-SF | Depressive symptoms; anxiety symptoms |
| Labella et al, 2023 58 | USA | 203 | cross-sectional | non-clinical | 45.8 | 5.8 | LEQ: Ad-hoc questionnaire | Death of parent; death of sibling; inter-parental conflict; parental separation or divorce; parental substance abuse problem; parental mental illness; parental physical illness; parental incarceration; foster care; prolonged parent-child separation (lifetime); sociodemographic risk (current) | PA | present | Ad-hoc coding system | behavior | SDQ | Social-behavioral problems |
| LaNoue et al, 2013 59 | USA | 158 | cross-sectional | non-clinical | 73 | 53.35 | Ad-hoc questions | Witnessing parental violence; sexual abuse, physical abuse, emotional neglect, physical neglect (childhood and adolescence) | PA | general | PANAS-P | subjective | not applicable | not applicable |
| Lazic et al, 2021 60 | Serbia | 293 | prospective | non-clinical | 77 | 20.5 | QAA–R (UFT subscale) | Negative experiences (childhood) | PA | longer periods of time | PANAS-P | subjective | not applicable | not applicable |
| Lehto et al, 2020 61 | UK | 228928 | cross-sectional | non-clinical | 53.21 | 56.86 | Ad-hoc item | adoption (childhood) | Happiness | general | Ad-hoc question | subjective | Ad-hoc questionnaire | Depressive symptoms |
| Li & Xiang, 2020 62 | China | 959 | cross-sectional | non-clinical | not reported | 19.08 | CTQ | Emotional abuse; physical abuse; emotional neglect; physical neglect (childhood and adolescence) | Pride | general | AHPPS-AP | subjective | not applicable | not applicable |
| Liu A et al, 2020 63 | China | 499 | cross-sectional | non-clinical | 52.9 | 14.9 | TEQ | Earthquake exposure (last 4.5 years) | Gratitude | general | GQ-6 | subjective | PCL-5; YRBS | PTSD symptoms; suicide riskc |
| Liu J et al, 2022 64 | China | 2396 | cross-sectional | non-clinical | 60.6 | 19.9 | CTQ-SF | Emotional abuse; physical abuse; sexual abuse; emotional neglect; physical neglect (before age 16) | Gratitude | general | GQ-7 | subjective | not applicable | not applicable |
| Liu P et al, 2021 65 | USA | 87 | prospective | non-clinical | 50.85 | 3.43 | SCID-IV; DAS; UCLA CSI; ad-hoc item | Maternal depression history; chronical familial stress; family income; parental relationship quality (lifetime) | Positive emotionality | present | Lab-TAB | behavior | CDI; CBCL | Depressive symptoms |
| Luterek et al, 2005 66 | USA | 40 | cross-sectional | non-clinical | 100 | 18.98 | LEQ | Sexual abuse (before age 14) | PA | present | PANAS-P | subjective | BDI; TSI | Depressive symptoms; PTSD symptoms |
| McQuarrie et al, 2023 67 | Canada | 305 | cross-sectional | non-clinical | 81.3 | 20.1 | CTQ-SF | Emotional abuse (childhood and adolescence) | PA | present | Ad-hoc questionnaire | subjective | PHQ-9 | Depressive symptoms |
| Mezquita et al, 2014 68 | Spain | 314 | cross-sectional | non-clinical | 61.5 | 21.2 | CTQ-SF | Emotional abuse; physical abuse; sexual abuse; emotional neglect; physical neglect (childhood and adolescence) | Positive emotionality | general | TCI-R | subjective | RAPS; ABS | Alcohol problems; antisocial behavior |
| Michels et al, 2012a 69 | Belgium | 437 | cross-sectional | non-clinical | 50.1 | 8.96 | CLESC | Negative events (last 6 months) | Happiness | longer periods of time | Ad-hoc question | subjective | SDQ; DEBQ | Emotional problems; conduct problems; hyperactivity; emotional eating |
| Michels et al, 2012b 70 | Belgium | 385 | cross-sectional | non-clinical | 52.4 | 8.44 | CLESC | Negative events (last year) | Happiness | longer periods of time | Ad-hoc question | subjective | SDQ | Emotional problems; conduct problems; hyperactivity |
| Morelen et al, 2016 71 | USA | 192 | cross-sectional | non-clinical | 100 | 28.8 | CTQ-SF | Emotional abuse; physical abuse; sexual abuse; emotional neglect; physical neglect (childhood and adolescence) | PA | present | MIPCS | behavior | PPDS; NWS-PTSD | Post-partum depressive symptoms; post-partum PTSD |
| Nayman et al, 2022 72 | USA | 213 | repeated | non-clinical | 42.25 | 30.13 | RFQ | Household dysfunction; neglect; physical abuse; emotional abuse (between the ages of 5–15 years) | PA | longer periods of time | PANAS-P | subjective | not applicable | not applicable |
| Nayman et al, 2023 73 | Germany | 52 | cross-sectional | non-clinical | 100 | 30.54 | CTQ-SF | Emotional abuse; physical abuse; sexual abuse; emotional neglect; physical neglect (childhood and adolescence) | PA | longer periods of time | PANAS-P | subjective | not applicable | not applicable |
| Nguyen-Feng et al, 2019 74 | USA | 358 | cross-sectional | non-clinical | 77 | 21.3 | CTQ-SF | Emotional abuse (childhood and adolescence) | PA | longer periods of time | PANAS-P | subjective | DASS-21 | Depressive symptoms, anxiety symptoms |
| Nishimi et al, 2021 75 | USA | 1429 | cross-sectional | non-clinical | 84.2 | 39.4 | CTQ-SF | Emotional abuse; physical abuse; sexual abuse; emotional neglect (childhood and adolescence) | PA | general | PANAS-P | subjective | BDI-II; MPSS | Depressive symptoms; PTSD symptoms |
| Nishimi et al, 2022 76 | USA | 3767 | prospective | non-clinical | 70 | 25.3 | CTQ-SF; CTSPC; Ad-hoc questions | Emotional abuse; physical abuse; sexual abuse; witnessing household abuse (childhood and adolescence) | PA | longer periods of time | MHI-PA | subjective | CESD; RCMAS (Worry/Oversensitivity Subscale) | Depressive symptoms; anxiety symptoms |
| Oltean et al, 2022 77 | Romania | 237 | cross-sectional | non-clinical | 83.5 | 27.2 | MAES | Adversity severity and multiplicity (childhood and adolescence) | Gratitude | longer periods of time | GQ-6 | subjective | PHQ-9 | Depressive symptoms |
| Oshio et al, 2013 78 | Japan | 3292 | cross-sectional | non-clinical | NA | 37.4 | Ad-hoc questions | Physical abuse; physical neglect (before age 15) | Happiness | general | Ad-hoc question | subjective | not applicable | not applicable |
| Paetzold et al, 2021 79 | UK; Australia; Netherlands | 108 | repeated | non-clinical | 56 | 23 | CTQ-SF | Emotional abuse; physical abuse; sexual abuse; emotional neglect; physical neglect (childhood and adolescence) | PA | present | Ad-hoc questionnaire | subjective | not applicable | not applicable |
| Pole et al, 2007 80 | USA | 90 | cross-sectional | non-clinical | 15.6 | 28.5 | LSCR | Disaster; serious illness; physical assault; serious accident; serious abuse; serious neglect; sexual assault (before age 14) | PA |  | PANAS-P; ERS | subjective | STAI; SCL-90 | Trait anxiety; general psychiatric distress |
| Ponnamperuma, 2022 81 | Sri Lanka | 753 | cross-sectional | non-clinical | 54 | 13.6 | UCLA PTSD Reaction Index; LTD‑Y; ad-hoc questions | Trauma exposure; tsunami exposure; household adversities; life stress (childhood and adolescence) | Happiness | general | Ad-hoc questionnaire | subjective | SDQ; UCLA-PTSD Index | Emotional and behavioral problems; PTSD symptom severity |
| Pries et al, 2020 82 | Belgium | 593 | repeated | non-clinical | 61 | 17.6 | CTQ-SF | Emotional abuse; physical abuse; sexual abuse; emotional neglect; physical neglect (childhood and adolescence) | PA | present | Ad-hoc questionnaire | subjective | not applicable | not applicable |
| Raney et al, 2024 83 | USA | 4515 | prospective | non-clinical | 51 | 13.3 | KSADS-5 PTSD Module– PR; ES-PR; FES – YR; FHA- PR; ABCD FHA; ABCD PD; CRPBI (AS- YR); PMS | Physical abuse; sexual abuse; household violence; substance abuse in the household; household mental illness; divorce/separation; criminal household member; emotional neglect; physical neglect; emotional abuse (during the COVID-19 pandemic) | PA | general | NIHTB-EB-C | subjective | not applicable | not applicable |
| Riley et al, 2020 84 | Poland | 454 | cross-sectional | non-clinical | 61.89 | 16.56 | JVQ | Exposure to conventional crime; child maltreatment; peer and sibling victimization; witnessing violence/indirect victimization; electronic victimization (childhood and adolescence) | PA | longer periods of time | PANAS-C-P | subjective | not applicable | not applicable |
| Robinson et al, 2009 85 | USA | 123 | cross-sectional | non-clinical | 47 | 2.71 | Official records; PVI | Physical abuse; neglect/failure to provide; neglect/failure to provide; sexual abuse; emotional maltreatment; dependency/abandonment; moral/legal/educational maltreatment (lifetime) | PA | present | PCIP (PA coding) | behavior | CBCL | Externalizing symptoms & internalizing symptoms |
| Roche-Miranda et al, 2023 86 | Puerto Rico | 121 | cross-sectional | mixed | 64 | 36.4 | CTQ-SF | Emotional abuse; physical abuse; sexual abuse; emotional neglect; physical neglect (childhood and adolescence) | PA | not reported | PANAS-P | subjective | BDI; BAI | Depressive symptoms; anxiety symptoms |
| Rose et al, 2023 87 | USA | 759 | cross-sectional | non-clinical | 57.6 | 24.92 | ACES; CTES | Emotional abuse; physical abuse; sexual abuse; emotional neglect; physical neglect; household dysfunction; exposure to traumatic events (before age 18) | PA | not reported | Ad-hoc questionnaire | subjective | not applicable | not applicable |
| Rzeszutek et al, 2024 88 | Poland | 609 | cross-sectional | mixed | 85.7 | 35.4 | CAST-6 | Children of alcoholics (childhood and adolescence) | PA | longer periods of time | PANAS-P | subjective | ITQ; PCL-5 | PTSD symptoms |
| Schacht et al, 2010 89 | USA | 33 | cross-sectional | non-clinical | 100 | 27 | Finkelhor’s interview questions; Sexual Experience Survey | Sexual abuse (before age 14) | PA | present | PANAS-P | subjective | not applicable | not applicable |
| Schutze et al, 2020 90 | Germany; Switzerland; Austria | 533 | cross-sectional | non-clinical | 100 | 35.4 | CTQ-SF | Emotional abuse; physical abuse; sexual abuse; emotional neglect; physical neglect (childhood and adolescence) | Happiness | not reported | HPQ | subjective | PHQ-9 | Depressive symptoms; anxiety symptoms |
| Schwartz & Drotar, 2006 91 | USA | 140 | cross-sectional | non-clinical | 58.6 | 21.9 | Official records; Ad-hoc questions | Childhood cancer | PA | longer periods of time | BMRS | subjective | CESD; PCL-C | Depressive symptoms; PTSD symptoms |
| Somers et al, 2017 92 | USA | 150 | cross-sectional | non-clinical | 60.67 | 19.7 | CTQ-SF | Emotional abuse; physical abuse; sexual abuse; emotional neglect; physical neglect (before age 16) | PA | longer periods of time | PANAS-P | subjective | BDI-II | Depressive symptoms |
| Stein et al, 2022 93 | USA; Canada | 120 | longitudinal | non-clinical | 100 | 31.86 | PDS | sexual abuse (before age 18) | PA | longer periods of time | CESD-PA | subjective | PTSS; CESD | PTSD symptoms; depressive symptoms |
| Talevi et al, 2018 94 | Italy | 101 | cross-sectional | clinical | 42.6 | 42.85 | RFQ | Household dysfunction; neglect; physical abuse; emotional abuse (between the ages of 5–15 years) | PA | not reported | PANAS-P | subjective | not applicable | not applicable |
| Teicher et al, 2015 95 | USA | 60 | repeated | non-clinical | 65 | 22 | TAI; CTS; CTQ-SF | Emotional abuse; physical abuse; sexual abuse; emotional neglect; physical neglect; witnessing violence; significant separations or losses; verbal abuse; parental discord (childhood and adolescence) | PA | present | PANAS-P | subjective | SQ | Anxiety symptoms; depressive symptoms; somatization; anger/hostility |
| Thoma et al, 2020 96 | Switzerland | 235 | cross-sectional | non-clinical | 46.4 | 70.43 | Official records; ad-hoc interview | Compulsory social measures and/or placement (childhood and adolescence) | PA | not reported | PANAS-P | subjective | not applicable | not applicable |
| Turiano et al, 2017 97 | USA | 6067 | cross-sectional | non-clinical | 53 | 46 | Ad-hoc questionnaire | Emotional abuse; physical abuse; household dysfunction (childhood and adolescence) | PA | longer periods of time | Ad-hoc questionnaire | subjective | not applicable | not applicable |
| Upenieks & Liu, 2022 98 | USA | 1371 | longitudinal | non-clinical | 44.5 | 70.33 | Ad-hoc questionnaire | Financial strain (between ages 6 -16 years) | Happiness | general | Ad-hoc question | subjective | CESD | Depressive symptoms |
| Vartanian et al, 2014 99 | USA | 748 | cross-sectional | non-clinical | 100 | 19.75 | RFQ | Household dysfunction; neglect; physical abuse; emotional abuse (between the ages of 5–15 years) | Gratitude | general | GQ-6 | subjective | EDE-Q | Eating Disorder symptoms |
| Vilete et al, 2014 100 | Brazil | 3231 | cross-sectional | non-clinical | 55.75 | not reported | Ad-hoc questionnaire | Traumatic event (before age 13) | PA | general | PANAS-P | subjective | not applicable | not applicable |
| Volgenau et al (study 1), 2023 101 | USA | 1239 | cross-sectional | non-clinical | 56.5 | 54.55 | CTQ-SF | Emotional abuse; physical abuse; sexual abuse; emotional neglect; physical neglect (childhood and adolescence) | PA | longer periods of time | MASQ | subjective | MASQ; CESD | General distress due to anxious symptoms; depressive symptoms |
| Volgenau et al (study 2), 2023 101 | USA | 855 | cross-sectional | non-clinical | 52.2 | 50.79 | CTQ-SF | Emotional abuse; physical abuse; sexual abuse; emotional neglect; physical neglect (childhood and adolescence) | PA | longer periods of time | MASQ | subjective | MASQ; CESD | General distress due to anxious symptoms; depressive symptoms |
| Wang et al, 2021 102 | Eritrea | 507 | cross-sectional | non-clinical | 45.5 | 19.7 | ACE-IQ | Physical abuse; emotional abuse; sexual abuse; household substance abuse; incarcerated family member; household mental illness; domestic violence; parental separation/divorce; emotional neglect; physical neglect; bullying; community violence; collective violence (before age 18) | SWB | longer periods of time | WHO-5 WBI | subjective | SRQ-20 | Psychological distress |
| Weilenmann et al, 2022 103 | Switzerland | 102 | cross-sectional | non-clinical | 73.55 | 23.52 | CTQ-SF | Emotional abuse; physical abuse; sexual abuse; emotional neglect; physical neglect (childhood and adolescence) | PA | not reported | PANAS-P | subjective | not applicable | not applicable |
| Wendt et al, 2019 104 | Brazil | 1080 | cross-sectional | non-clinical | 48.2 | 11.2 | Official records | Institutionalized children (current) | PA | present | PANAS-C-P | subjective | not applicable | not applicable |
| Wooten et al, 2022 105 | USA | 200 | repeated | non-clinical | 42.5 | not reported | CTQ | Emotional abuse; physical abuse; sexual abuse; emotional neglect; physical neglect (childhood and adolescence) | PA | present | Ad-hoc question | subjective | BDI; STAI | Depressive symptoms; anxiety symptoms |
| Wu et al, 2018 106 | China | 358 | cross-sectional | non-clinical | 63.1 | 19.18 | CTQ-SF | Emotional abuse; physical abuse; sexual abuse; emotional neglect; physical neglect (childhood and adolescence) | Gratitude | general | GQ-6 | subjective | STDQ (TDS) | Depressive symptoms |
| Xiang et al, 2021a 107 | China | 811 | cross-sectional | non-clinical | 73.24 | 19.54 | CTQ-SF | Emotional abuse; physical abuse; emotional neglect; physical neglect (childhood and adolescence) | PA | not reported | PANAS-P | subjective | not applicable | not applicable |
| Xiang et al, 2021b 108 | China | 677 | cross-sectional | non-clinical | 72.5 | 19.17 | CTQ-SF | Emotional abuse; physical abuse; emotional neglect; physical neglect (childhood and adolescence) | Gratitude | general | GQ-6 | subjective | not applicable | not applicable |
| Yen et al, 2013 109 | USA | 119 | repeated | non-clinical | 67.2 | 15.3 | K-SADS-PL | abuse (lifetime) | PA | general | AIM | subjective | FASM; CI-BPD; SIQ; ad-hoc questionnaire; AQ | Self-injurious behaviore; no. of BPD symptoms; no. of psychiatric diagnoses; suicide ideationc; suicide attemptsc; aggression |
| Yu et al, 2020 110 | China | 897 | cross-sectional | non-clinical | 54.2 | 15.41 | CTQ-SF | Emotional abuse; physical abuse; sexual abuse; emotional neglect; physical neglect (lifetime) | Gratitude | general | GQ-6 | subjective | not applicable | not applicable |
| Zhang & Li, 2022 111 | China | 1845 | cross-sectional | non-clinical | 47.9 | 13.07 | CTQ-SF | Emotional neglect; physical neglect; left behind in childhood (lifetime) | Gratitude | general | GQ-7 | subjective | not applicable | not applicable |
| Zhou et al, 2024 112 | China | 187 | cross-sectional | mixed | 72.03 | 17.45 | CTQ-SF | Emotional abuse; physical abuse; sexual abuse; emotional neglect; physical neglect (childhood and adolescence) | Pleasure | general | TEPS | subjective | BDI | Depressive symptoms |

*Note.* a We coded the clinical status of the sample, distinguishing between clinical samples, which included patients diagnosed for a current mental disorders, using an established clinical interview (e.g., Structured Clinical Interview for DSM), and non-clinical samples which included students or community dwellers who were typically recruited through campus or online advertisements. In addition, samples which included both patients with a current mental disorder and either students and community dwellers (e.g., control group), or former patients who no longer met the diagnostic criteria for a mental disorder were coded as "mixed". b This study was an outlier and was excluded from the analysis. c Based on the focus of the assessment, the construct was considered similar to the suicide-related criterion of major depressive disorder or borderline personality disorder. d Self-destructive behaviors refer to criteria from several mental disorders and were considered as such: (1) substance-related behaviors (corresponding to criteria from substance-related disorders or the impulsivity criterion of borderline personality disorder); (2) disordered eating (corresponding to criteria from eating disorders or the impulsivity criterion of borderline personality disorder); (3) sexual impulsivity (corresponding to the impulsivity criterion of borderline personality disorder); (4) self-harm behaviors (corresponding to the self-injury criterion of borderline personality disorder); and (5) suicidality (corresponding to the suicide-related criterion of major depressive disorder or borderline personality disorder).e Based on the focus of the assessment, the construct was considered similar to the self-injury criterion of borderline personality disorder. f Based on the focus of the assessment, the construct was considered similar to the behavior disturbances criteria of conduct disorder.

*Abbreviations:* ABCD FHA, Adolescent Brain Cognitive Development Study Family History Assessment-Parent Report; ABCD PDS, Adolescent Brain Cognitive Development Study Parent Demographics Survey; ABS, Aggression Behavior Scale; ABS-PA, Affect Balance Scale- Positive Affect; ACE-IQ, The Adverse Childhood Experience International Questionnaire; ACES, Adverse Childhood Experiences Questionnaire; AHPPS-AP, Authentic and Hubristic Pride-Proneness Scale- Authentic Pride; AIM, The Affect Intensity Measure; API, Abuse-perpetration Inventory; APQ, Alabama Parenting Questionnaire; AQ, Aggression Questionnaire; ASPQ, Arabic Parenting Style Questionnaire; BAI, Beck Anxiety Inventory; BDI-II, Beck Depression Inventory-II; BDI-Y, Beck Depression Inventory for Youth; BMRS, Brief Mood Rating Scale; BRFSS ACE module, Behavioral Risk Factor Surveillance System- Adverse Childhood Experiences module; BSI-DEP, Brief Symptom Inventory - Depression Subscale; CAHQ. Caseworker Abuse History Questionnaire; CASRS, Child Abuse Self Report Scale; CAST, Children of Alcoholics Screening test; CATS, The Child Abuse and Trauma Scale; CBCL, Child Behavior Checklist; CDI, Children's Depression Inventory; CESD-20, Center for Epidemiologic Studies Depression Scale; CI-BPD, Childhood Interview for Borderline Personality Disorder; CIDI, Composite International Diagnostic Interview; CLESC, Coddington Life Events Scale for children; CRIES-13, Children’s Impact of Event Scale; CRPBI (AS-YR), Children's Report of Parental Behavior Inventory (Acceptance Subscale– Youth Report); CTES, Childhood Traumatic Events Scale; CTI, Comprehensive Trauma Interview; CTQ-SF, Childhood Trauma Questionnaire- Short Form; CTS, The Conflict Tactics Scale; CTSPC, Conflict Tactics Scales: Parent-child Version; DAS, Dyadic Adjustment Scale; DASS-21, Depression, Anxiety, and Stress Scales; DAYS, Depression and Anxiety Youth Scale; DEBQ, Dutch Eating Behaviour Questionnaire; DIA-S4, Depression in old Age Scale; DSHI, Deliberate Self-harm Inventory; EAT-Q, Early Adversity and Trauma Experiences Questionnaire; EDE-Q, Eating Disorder Examination Questionnaire; EMFACS, Emotion Facial Action Coding System; ES-PR, Environment Scale- Parent Report; FASM, Functional Assessment of Self-Mutilation; FBS, Fragebogen belastender Sozialerfahrungen (FBS; questionnaire on stressful social experiences); FES-YR, Family Environment Scale – Youth Report; FHA-PR, Family History Assessment - Parent Report; GAC, Gratitude Adjective Checklist; GQ-6, The Gratitude Questionnaire – Six Item Form; HDIS-PE, Hedonic Deficit and Interference Scale- positive emotionality subscale; HDRS, Hamilton Depression Rating Scale; HPQ, Hinz Partnership Quality; IBQ-R, Revised Infant Behavior Questionnaire; ISECA, Inventory of Stressful Events in Childhood and Adolescence; ITQ, International Trauma Questionnaire; JVQ, Juvenile Victimization Questionnaire; K-SADS-5 PTSD Module, Kiddie Schedule for Affective Disorders and Schizophrenia for School-Age Children, Fifth Revision, Post-Traumatic Stress Disorder Module, Parent Report; K-SADS–PL (PASI subscale), Kiddie Schedule for Affective Disorders and Schizophrenia-Present and Lifetime Version (Passive or active suicidal ideation subscale); Lab-TAB, The Infant Version of the Laboratory Temperament Assessment Battery; LEQ, Lifetime Events Questionnaire; LSCR, Life Stressor Checklist—Revised; LTD Y, Long term Difficulties Questionnaire for Youth; MADRS, Montgomery Åsberg Depression Rating Scale; MAES, Maltreatment Abuse and Exposure Scale; MASQ, Mood and Anxiety Symptom Questionnaire; MCS, Maltreatment Classification System; M-FCPCS, Modified Fawcett-Clark Pleasure Capacity Scale; MHC-SF, Mental Health Continuum–Short Form; MHI-PA, Mental Health Inventory- Positive Affect; MI, Maltreatment Interview; MINI, Mini International Neuropsychiatric Interview; MIPCS, MACY Infant-Parent Coding System; MNBS, Multidimensional Neglect Behavior Scale; MPSS, Modified PTSD Symptom Scale; NIHTB-EB-C, National Institutes of Health Toolbox Emotion Battery for Children; NWS-PTSD, The National Women’s Study Post-Traumatic Stress Disorder Module; OCTS-PA, Observed Child Temperament Scale-Positive Affect; P-COS, Parent-Clinical Observation Schedule; PANAS-C-P, Positive and Negative Affect Schedule-Positive for Children; PANAS-P, Positive and Negative Affect Schedule-Positive; PANAS-SF-P, Positive and Negative Affect Schedule-Short Form-Positive; PAPA, Preschool-Age Psychiatric Assessment; PBI, Parental Bonding Instrument; PCIP, Parent–Child Interaction Procedure; PCL-5, Post-traumatic Stress Disorder Checklist for DSM 5; PCL-C, PTSD Checklist Civilian Version; PCS, Pride coding system (Geppert, 1986; Stipek et al., 1992); PDS, Posttraumatic Diagnostic Scale; PELQ, The COVID- 19 Pandemic Exposure and Loss Questions; PHQ-9, Patient Health Questionnaire-9; PI, Parentification Inventory; PIIS, Parent Infant Interaction Scale; PMQ, Psychological Maltreatment Questionnaire; PMR, Psychological Maltreatment Review; PMS, Parental Monitoring Survey; POMS-Bi, Profile of Mood States-Bi-Polar; PPDS, Postpartum Depression Screening Scale; PROMIS EC, The Patient-Reported Outcomes Measurement Information System Early Childhood; PROMIS-SF-ED, Patient-Reported Outcomes Measurement Information System- Short Form – Emotional Distress; PTSS, Post-Traumatic Stress Scale; PVI, Partner Violence Inventory; QAA–R, Revised Questionnaire for Attachment Assessment; RAPS, Rapid Alcohol Problems Screen; RCMAS, Revised Children's Manifest Anxiety Scale; RFQ, Risky Families Questionnaire; SAS, Social Anxiety Scale; SCARED (GAD subscale), Screen for Child Anxiety Related Emotional Disorders (Generalised Anxiety Disorder subscale); SCID-IV, Structured Clinical Interview for DSM-IV; SCL-90-R, Symptom Checklist-90-Revised; SDQ, Strength and Difficulties Questionnaire; SES, Sexual Experience Survey; SHAPS, Snaith-Hamilton Pleasure Scale; SIAS, Social Interaction Anxiety Scale; SI-PTSD, Structured Interview for PTSD; SIQ, Suicidal Ideation Questionnaire; SI-SDB, Structured Interview of Self-Destructive Behaviors; SMFQ, Short Mood and Feelings Questionnaire; SPAHQ, The Sexual-Physical Abuse History Questionnaire; SPS, Social Phobia Scale; SQ, Kellner's symptom questionnaire; SRQ-20, Self-Reporting Questionnaire-20; STAI, State-Trait Anxiety Inventory; STDQ (TDS), State–Trait Depression Questionnaire (trait depression subscale); SWB, Subjective Well-being; TAI, Traumatic Antecedents Interview; TCI-R, Temperament and Character Inventory—Revised; TEPS, Temporal Experience of Pleasure Scale; TEQ, Traumatic Exposure Questionnaire; TMMI, Trauma Meaning-Making Interview; TSI, Trauma Symptom Inventory; UCLA CSI, University of California, Los Angeles Chronic Stress Interview; UCLA-PTSD Index, University of California, Los Angeles Post-Traumatic Stress Disorder Index; UFT, Unresolved Family Traumatization; WHO-5 WBI, World Health Organization Well-Being Index; YRBS, Youth Risk Behavior Survey.

**Supplementary Fig. 1** Galbraith plot of the correlations between ACEs and PA, indicating that the study of Hautle et al. (2023) is an outlier.

**Supplementary Table 2**

Descriptive statistics for each correlation before the exclusion of the outlier study

| Construct pair | Mean correlation | SE | τ | *I2* | *k* | *n* |
| --- | --- | --- | --- | --- | --- | --- |
| ACE – PA | -0.12 | 0.01 | 0.01 | 95.61% | 115 | 305928 |
| ACE – psychopathology | 0.19 | 0.01 | 0.01 | 94.11% | 58 | 257645 |
| PA – psychopathology | -0.28 | 0.02 | 0.02 | 97.59% | 47 | 26956 |

*Note:* As described in the main text, one study (Hautle et al., 2023) reported an unusually high correlation between ACEs and PA (r = -0.99) and was qualified as an outlier in the Galbraith plot (see Supplementary Fig. 1).

Abbreviations: ACE, adverse childhood events; PA, positive affect.

**Supplementary Table 3**

Path coefficients in the structural model before the exclusion of the outlier study

| Path | Beta | SE | LLCI | ULCI |
| --- | --- | --- | --- | --- |
| ACE – PA | -0.12 | 0.01 | -0.15 | -0.10 |
| ACE – psychopathology | 0.16 | 0.018 | 0.12 | 0.19 |
| PA – psychopathology | -0.25 | 0.026 | -0.31 | 0.20 |
| Indirect effect | 0.03 | - | 0.02 | 0.04 |

*Note:* As described in the main text, one study (Hautle et al., 2023) reported an unusually high correlation between ACEs and PA (r = -0.99) and was qualified as an outlier in the Galbraith plot (see Supplementary Fig. 1).

Abbreviations: ACE, adverse childhood events; PA, positive affect.

**Supplementary Table 4**

Variance in the correlation coefficients explained by moderators (significant moderators)

|  | ACEs→PA *R2* | ACEs→psychopathology *R2* | PA→Psychopathology *R2* |
| --- | --- | --- | --- |
|
| Type of ACEs (maltreatment vs. other ACEs) | 0.118 | 0.517 | 0.082 |
| Type of PA measure (happiness and well-being vs. positive emotions) | 0.020 | 0.157 | 0.000 |
| Type of PA measure (positive emotions vs. gratitude) | 0.171 | 0.150 | 0.030 |
| Time frame of PA measure (general vs. present) | 0.010 | 0.347 | 0.083 |
| Type of PA measure (behavioral vs. self-report) | -0.020 | 0.093 | 0.189 |
| Age group (adults vs. children and adolescents) | -0.020 | 0.129 | 0.096 |
| Type of psychopathology (internalizing vs. externalizing) | 0.011 | 0.036 | 0.229 |
| Validity of ACEs measures (non-validated vs. validated) | 0.067 | 0.321 | -0.004 |
| Validity of PA measures (non-validated vs. validated) | 0.020 | 0.093 | 0.152 |

*Note:* R2 was calculated in the between-studies variance of the model, with and without the moderator. This coefficient shows the portion of the variance in each correlation coefficient that is explained by the moderator.

Abbreviations: ACE, adverse childhood events; PA, positive affect.

**Supplementary Table 5**

Moderating effects on path coefficients in the structural model (non-significant effects)

| Moderator (and global test of moderation) | Total samples and subgroups | Path | Beta | SE | *z* |
| --- | --- | --- | --- | --- | --- |
| Type of ACEs measure (*χ2*[3] = 2.28, *p* < 0.515) | Interview (*k* = 8; *n* = 6024) | ACE – PA | -0.06 | 0.03 | -1.76 |
| ACE – psychopathology | 0.10 | 0.03 | 2.88** |
| PA – psychopathology | -0.25 | 0.05 | -4.76*** |
| Questionnaire (*k* = 96; *n* = 298367) | ACE – PA | -0.07 | 0.03 | -1.96* |
| ACE – psychopathology | 0.08 | 0.04 | 2.00* |
| PA – psychopathology | -0.00 | 0.06 | -0.06 |
| Time frame of PA measure (*χ2*[3] = 6.34, *p* = 0.096) | General (*k* = 32; *n* = 253413) | ACE – PA | -0.13 | 0.02 | -5.08*** |
| ACE – psychopathology | 0.09 | 0.02 | 30.29*** |
| PA – psychopathology | -0.23 | 0.03 | -5.97*** |
| Longer periods of time (*k* = 30; *n* = 38816) | ACE – PA | 0.02 | 0.03 | 0.62 |
| ACE – psychopathology | 0.02 | 0.03 | 0.80 |
| PA – psychopathology | -0.12 | 0.05 | -2.14* |
| Time frame of PA measure (*χ2*[3] = 4.46, *p* = 0.215) | General (*k* = 32; *n* = 253413) | ACE – PA | -0.13 | 0.02 | -5.08*** |
| ACE – psychopathology | 0.09 | 0.02 | 30.29*** |
| PA – psychopathology | -0.23 | 0.03 | -5.97*** |
| Not reported (*k* = 16; *n* = 6974) | ACE – PA | 0.01 | 0.04 | 2.91 |
| ACE – psychopathology | 0.11 | 0.06 | 1.73 |
| PA – psychopathology | -0.06 | 0.07 | -0.85 |
| Study design (*χ2*[3] = 1.57, *p* = 0.666) | Longitudinal (*k* = 26; *n* = 16764) | ACE – PA | -0.09 | 0.02 | -3.39*** |
| ACE – psychopathology | 0.16 | 0.04 | 3.62*** |
| PA – psychopathology | -0.30 | 0.07 | -4.20*** |
| Cross-sectional (*k* = 88; *n* = 289084) | ACE – PA | -0.03 | 0.03 | -1.11 |
| ACE – psychopathology | -0.00 | 0.05 | -0.17 |
| PA – psychopathology | 0.04 | 0.07 | 0.61 |
| Clinical status (*χ2*[3] = 2.03, *p* = 0.566) | Non-clinical (*k* = 96; *n* = 303055) | ACE – PA | -0.12 | 0.01 | -8.86*** |
| ACE – psychopathology | 0.16 | 0.01 | 7.83*** |
| PA – psychopathology | -0.25 | 0.02 | -8.39*** |
| Clinical (*k* = 8; *n* = 843) | ACE – PA | 0.01 | 0.06 | 8.65 |
| ACE – psychopathology | -0.12 | 0.10 | -1.22 |
| PA – psychopathology | 0.05 | 1.13 | 0.37 |
| Clinical status (*χ2*[3] = 3.65, *p* = 0.302) | Non-clinical (*k* = 96; *n* = 303055) | ACE – PA | -0.12 | 0.01 | -8.86*** |
| ACE – psychopathology | 0.16 | 0.01 | 7.83*** |
| PA – psychopathology | -0.25 | 0.02 | -8.39*** |
| Mixed (*k* = 10; *n* = 1950) | ACE – PA | 0.03 | 0.05 | 0.60 |
| ACE – psychopathology | 0.07 | 0.05 | 1.28 |
| PA – psychopathology | -0.08 | 0.07 | -1.11 |
| Type of psychopathology measure (*χ2*[3] = 2.81, *p* = 0.422) | Clinical interview (*k* = 7; *n* = 1197) | ACE – PA | -0.10 | 0.05 | -1.69 |
| ACE – psychopathology | 0.21 | 0.05 | 3.65*** |
| PA – psychopathology | -0.13 | 0.09 | -1.41 |
| Self- and other-report questionnaires (*k* = 54; *n* = 258858) | ACE – PA | -0.02 | 0.06 | -0.32 |
| ACE – psychopathology | -0.06 | 0.06 | -1.00 |
| PA – psychopathology | -0.14 | 0.09 | -1.48 |
| Representative sample (*χ2*[3] = 5.34, *p* = 0.148) | Non-validated (*k* = 83; *n* = 37040) | ACE – PA | -0.13 | 0.01 | -8.39*** |
| ACE – psychopathology | 0.18 | 0.02 | 8.32*** |
| PA – psychopathology | -0.25 | 0.03 | -7.85*** |
| Validated (*k* = 31; *n* = 268808) | ACE – PA | 0.03 | 0.02 | 1.07 |
| ACE – psychopathology | -0.07 | 0.03 | -1.88 |
| PA – psychopathology | -0.03 | 0.05 | -0.56 |
| Non-clinical participants included in the sample (*χ2*[3] = 2.37, *p* = 0.499) | Non-validated (*k* = 8; *n* = 843) | ACE – PA | -0.11 | 0.05 | -1.97* |
| ACE – psychopathology | 0.03 | 0.10 | 0.29 |
| PA – psychopathology | -0.19 | 0.13 | -1.53 |
| Validated (*k* = 106; *n* = 305005) | ACE – PA | -0.00 | 0.05 | -0.13 |
| ACE – psychopathology | 0.13 | 0.10 | 1.29 |
| PA – psychopathology | -0.06 | 0.13 | -0.47 |
| Attempt to confirm the absence of psychopathology in the putative non-clinical group (*χ2*[3] = 4.02, *p* = 0.259) | Non-validated (*k* = 99; *n* = 300868) | ACE – PA | -0.12 | 0.01 | -9.28*** |
| ACE – psychopathology | 0.14 | 0.01 | 7.53*** |
| PA – psychopathology | -0.25 | 0.02 | -9.12*** |
| Validated (*k* = 15; *n* = 4980) | ACE – PA | 0.04 | 0.04 | 1.13 |
| ACE – psychopathology | 0.08 | 0.05 | 1.51 |
| PA – psychopathology | -0.05 | 0.07 | -0.69 |
| Participants with and without ACEs (*χ2*[3] = 2.33, *p* = 0.506) | Non-validated (*k* = 5; *n* = 7020) | ACE – PA | -0.04 | 0.05 | -0.73 |
| ACE – psychopathology | 0.13 | 2.13 | 0.03* |
| PA – psychopathology | -0.28 | 0.08 | -3.32*** |
| Validated (*k* = 109; *n* = 298828) | ACE – PA | -0.08 | 0.06 | -1.40 |
| ACE – psychopathology | 0.02 | 0.06 | 0.33 |
| PA – psychopathology | 0.02 | 0.09 | 0.30 |
| Attempt to confirm the absence of ACEs (*χ2*[3] = 3.89, *p* = 0.273) | Non-validated (*k* = 5; *n* = 4330) | ACE – PA | -0.02 | 0.05 | -0.36 |
| ACE – psychopathology | 0.13 | 0.05 | 2.37* |
| PA – psychopathology | -0.28 | 0.08 | -3.36*** |
| Validated (*k* = 109; *n* = 301518) | ACE – PA | -0.10 | 0.05 | -1.79 |
| ACE – psychopathology | 0.02 | 0.06 | 0.42 |
| PA – psychopathology | 0.03 | 0.09 | 0.34 |
| Multiple informants for ACEs (*χ2*[3] = 2.46, *p* = 0.481) | Non-validated (*k* = 103; *n* = 302309) | ACE – PA | -0.11 | 0.01 | -8.57*** |
| ACE – psychopathology | 0.16 | 0.01 | 8.47*** |
| PA – psychopathology | -0.26 | 0.02 | -9.78*** |
| Validated (*k* = 9; *n* = 3539) | ACE – PA | -0.05 | 0.04 | -1.21 |
| ACE – psychopathology | -0.04 | 0.06 | -0.72 |
| PA – psychopathology | 0.05 | 0.09 | 0.61 |
| Dichotomized scores (*χ2*[3] = 4.96, *p* = 0.175) | Non-validated (*k* = 30; *n* = 267081) | ACE – PA | -0.09 | 0.02 | -3.89*** |
| ACE – psychopathology | 0.10 | 0.03 | 3.05** |
| PA – psychopathology | -0.27 | 0.05 | -4.94*** |
| Validated (*k* = 84; *n* = 38767) | ACE – PA | -0.03 | 0.02 | -1.22 |
| ACE – psychopathology | 0.06 | 0.04 | 1.68 |
| PA – psychopathology | 0.01 | 0.06 | 0.27 |

*Note.* In all moderator analyses, the structural model is first tested in a subgroup of studies that is taken as reference category. Therefore, in this table, coefficients in the first subgroup of studies indicate the strength and direction of each path in that subgroup. In contrast, coefficients in the second subgroup of studies (i.e., comparison category) indicate the direction and strength of *change* in each pathway relative to the reference category.

Abbreviations: ACE, adverse childhood events; PA, positive affect. * *p* < 0.05; ** *p* < 0.01; *** *p* < 0.001

**Supplementary Table 6**

Ratings on quality criteria

| Study | Representative sample | Participants with and without ACEs | Attempt to confirm the absence of ACEsa | Multiple informants in ACEs assessment | Valid measures used to assess ACEsb, c | Valid measures used to assess PAd | Non-clinical participants included in the samplee | Attempt confirm the absence of psychopathology in the putatively non-clinical groupf | Dichotomized scoresg |
| --- | --- | --- | --- | --- | --- | --- | --- | --- | --- |
| Alessandri & Lewis, 1996 | 0 | 1 | 1 | 1 | 1 | 1 | 1 | 0 | 1 |
| Alkhalaf, 2015 | 0 | 1 | 1 | 0 | 1 | 1 | 1 | 0 | 1 |
| Arslan & Yıldırım, 2022 | 0 | 1 | 1 | 1 | 1 | 1 | 1 | 0 | 0 |
| Arslan, 2017 | 0 | 1 | 1 | 0 | 1 | 1 | 1 | 0 | 1 |
| Baugher et al, 2024 | 0 | 1 | 1 | 0 | 1 | 1 | 1 | 1 | 1 |
| Bendezú et al, 2022 | 0 | 1 | 1 | 0 | 1 | 1 | 1 | 1 | 1 |
| Bonano et al, 2002 | 0 | 1 | 1 | 1 | 1 | 1 | 1 | 0 | 0 |
| Bradley et al, 2013 | 0 | 1 | 1 | 0 | 1 | 1 | 1 | 0 | 0 |
| Brick et al, 2021 | 0 | 1 | 1 | 0 | 1 | 1 | 0 | 0 | 1 |
| Brodski & Hutz, 2012 | 0 | 1 | 1 | 0 | 1 | 1 | 1 | 0 | 1 |
| Brunton & Dryer, 2024 | 0 | 1 | 1 | 0 | 1 | 1 | 1 | 0 | 1 |
| Burton et al, 2018 | 0 | 1 | 1 | 0 | 1 | 1 | 1 | 0 | 1 |
| Carlton et al, 2021 | 1 | 1 | 1 | 0 | 1 | 1 | 1 | 0 | 1 |
| Cavazzoni et al, 2022 | 0 | 1 | 1 | 0 | 1 | 1 | 1 | 0 | 0 |
| Cipriano et al, 2011 | 0 | 1 | 1 | 1 | 1 | 1 | 1 | 0 | 1 |
| Cohen et al, 2022 | 0 | 1 | 1 | 0 | 1 | 1 | 1 | 0 | 1 |
| Corcoran & McNulty, 2018 | 0 | 1 | 1 | 0 | 1 | 1 | 1 | 0 | 1 |
| Crandall et al, 2019 | 0 | 1 | 1 | 0 | 1 | 1 | 1 | 0 | 0 |
| de Abreu et al, 2023 | 1 | 0 | 0 | 0 | 1 | 1 | 1 | 1 | 0 |
| DePierro et al, 2018 (study 1) | 0 | 1 | 1 | 0 | 1 | 1 | 1 | 0 | 1 |
| DePierro et al, 2018 (study 2) | 0 | 1 | 1 | 0 | 1 | 1 | 1 | 0 | 1 |
| Dokuz et al, 2022 | 0 | 1 | 1 | 0 | 1 | 1 | 0 | 0 | 1 |
| Drukker et al, 2020 | 0 | 1 | 1 | 0 | 1 | 0 | 0 | 0 | 0 |
| Erato et al, 2024 | 0 | 1 | 1 | 0 | 1 | 0 | 1 | 0 | 1 |
| Etter et al, 2013 | 0 | 1 | 1 | 0 | 1 | 0 | 0 | 0 | 1 |
| Fillingim & Edwards, 2005 | 0 | 1 | 1 | 0 | 1 | 1 | 1 | 0 | 1 |
| Fitzgerald & Berthiaume, 2021 | 1 | 1 | 1 | 0 | 0 | 0 | 1 | 0 | 1 |
| Fitzgerald & Esplin, 2022 | 1 | 1 | 1 | 0 | 1 | 0 | 1 | 0 | 0 |
| Frewen et al, 2012 | 0 | 1 | 1 | 0 | 1 | 1 | 1 | 0 | 0 |
| Galea et al, 2007 | 1 | 1 | 1 | 0 | 1 | 1 | 1 | 0 | 1 |
| George et al, 2014 | 0 | 1 | 1 | 0 | 1 | 1 | 1 | 0 | 1 |
| Gratz, 2006 | 0 | 1 | 1 | 0 | 1 | 1 | 1 | 0 | 0 |
| Greene et al, 2021 | 0 | 1 | 1 | 0 | 1 | 1 | 1 | 0 | 1 |
| Grusnick et al, 2020 | 1 | 1 | 1 | 0 | 0 | 1 | 1 | 0 | 0 |
| Guhn et al, 2018 (study 1) | 0 | 1 | 1 | 0 | 1 | 1 | 1 | 1 | 1 |
| Guhn et al, 2018 (study 2) | 0 | 1 | 1 | 0 | 1 | 1 | 1 | 1 | 1 |
| Han et al, 2023 | 1 | 1 | 1 | 0 | 1 | 1 | 1 | 0 | 0 |
| Hasmi et al, 2017 | 0 | 1 | 1 | 0 | 1 | 1 | 1 | 0 | 0 |
| Hauber et al, 2021 | 1 | 1 | 0 | 0 | 0 | 1 | 1 | 0 | 1 |
| Hautle et al, 2023 | 0 | 1 | 1 | 0 | 1 | 1 | 1 | 1 | 1 |
| Heshmati et al, 2021 | 0 | 1 | 1 | 0 | 1 | 1 | 1 | 0 | 1 |
| Holzman et al, 2017 | 0 | 1 | 1 | 0 | 0 | 1 | 1 | 1 | 1 |
| Iffland et al, 2014 | 0 | 1 | 1 | 0 | 1 | 1 | 1 | 1 | 1 |
| Infurna et al, 2015 | 1 | 1 | 1 | 0 | 1 | 1 | 1 | 0 | 1 |
| Infurna et al, 2023 | 1 | 1 | 1 | 0 | 1 | 1 | 1 | 0 | 1 |
| Ion et al, 2023 | 0 | 1 | 1 | 0 | 1 | 1 | 1 | 0 | 1 |
| Jackson et al, 1990 | 0 | 1 | 1 | 0 | 1 | 1 | 1 | 0 | 1 |
| Jeon & Bae, 2022 | 1 | 1 | 1 | 0 | 1 | 1 | 1 | 0 | 1 |
| Jerud et al, 2014 | 0 | 1 | 1 | 0 | 0 | 1 | 0 | 0 | 1 |
| Julian et al, 2019 | 0 | 1 | 1 | 0 | 1 | 1 | 1 | 1 | 0 |
| Jung, 2018 | 1 | 1 | 1 | 0 | 0 | 0 | 1 | 0 | 0 |
| Kelifa et al, 2021 | 1 | 1 | 1 | 0 | 1 | 1 | 1 | 0 | 1 |
| Kim et al, 2023 | 1 | 1 | 1 | 0 | 0 | 0 | 1 | 0 | 0 |
| Koening et al, 2000 | 0 | 1 | 1 | 1 | 1 | 1 | 1 | 0 | 1 |
| Kong et al, 2023 | 0 | 1 | 1 | 0 | 1 | 1 | 1 | 0 | 1 |
| Krijnen et al, 2023 | 0 | 1 | 1 | 0 | 0 | 1 | 1 | 0 | 0 |
| Kumar et al, 2023 | 1 | 1 | 1 | 0 | 0 | 0 | 1 | 0 | 1 |
| Kuzminskaite et al, 2024 | 1 | 1 | 1 | 0 | 1 | 0 | 1 | 1 | 1 |
| Kwok et al, 2024 | 1 | 1 | 1 | 0 | 1 | 1 | 1 | 0 | 1 |
| Labella et al, 2023 | 0 | 0 | 0 | 1 | 1 | 1 | 1 | 0 | 1 |
| LaNoue et al, 2013 | 0 | 1 | 1 | 0 | 0 | 1 | 1 | 0 | 0 |
| Lazic et al, 2021 | 0 | 1 | 1 | 0 | 1 | 1 | 1 | 0 | 1 |
| Lehto et al, 2020 | 1 | 1 | 1 | 0 | 0 | 0 | 1 | 0 | 0 |
| Li & Xiang, 2020 | 1 | 1 | 1 | 0 | 1 | 1 | 1 | 0 | 1 |
| Liu A et al, 2020 | 0 | 1 | 1 | 0 | 0 | 1 | 1 | 0 | 1 |
| Liu J et al, 2022 | 0 | 1 | 1 | 0 | 0 | 1 | 1 | 0 | 1 |
| Liu P et al, 2021 | 0 | 1 | 1 | 0 | 1 | 1 | 1 | 1 | 1 |
| Luterek et al, 2005 | 0 | 1 | 1 | 0 | 1 | 1 | 1 | 0 | 1 |
| McQuarrie et al, 2023 | 0 | 1 | 1 | 0 | 1 | 0 | 1 | 0 | 1 |
| Mezquita et al, 2014 | 0 | 1 | 1 | 0 | 1 | 1 | 1 | 0 | 1 |
| Michels et al, 2012a | 1 | 1 | 1 | 0 | 1 | 0 | 1 | 0 | 1 |
| Michels et al, 2012b | 1 | 1 | 1 | 0 | 1 | 0 | 1 | 0 | 1 |
| Morelen et al, 2016 | 0 | 1 | 1 | 0 | 1 | 1 | 1 | 0 | 1 |
| Nayman et al, 2022 | 0 | 1 | 1 | 0 | 1 | 1 | 1 | 0 | 1 |
| Nayman et al, 2023 | 0 | 1 | 1 | 0 | 1 | 1 | 0 | 0 | 1 |
| Nguyen-Feng et al, 2019 | 0 | 1 | 1 | 0 | 1 | 1 | 1 | 0 | 0 |
| Nishimi et al, 2021 | 0 | 0 | 0 | 0 | 1 | 1 | 1 | 0 | 1 |
| Nishimi et al, 2022 | 0 | 1 | 1 | 0 | 1 | 1 | 1 | 0 | 1 |
| Oltean et al, 2022 | 0 | 1 | 1 | 0 | 1 | 1 | 1 | 0 | 1 |
| Oshio et al, 2013 | 1 | 1 | 1 | 0 | 0 | 0 | 1 | 0 | 0 |
| Paetzold et al, 2021 | 0 | 1 | 1 | 0 | 1 | 1 | 1 | 1 | 1 |
| Pole et al, 2007 | 0 | 1 | 1 | 0 | 1 | 1 | 1 | 1 | 0 |
| Ponnamperuma, 2022 | 1 | 1 | 1 | 0 | 1 | 0 | 1 | 0 | 1 |
| Pries at al, 2020 | 0 | 1 | 1 | 0 | 1 | 1 | 1 | 0 | 1 |
| Raney et al, 2023 | 1 | 0 | 1 | 0 | 1 | 1 | 1 | 0 | 0 |
| Riley et al, 2020 | 0 | 1 | 1 | 0 | 1 | 1 | 1 | 0 | 0 |
| Robinson et al, 2009 | 0 | 1 | 1 | 1 | 1 | 1 | 1 | 0 | 1 |
| Roche-Miranda et al, 2023 | 0 | 1 | 1 | 0 | 1 | 1 | 1 | 1 | 1 |
| Rose et al, 2023 | 0 | 1 | 1 | 0 | 1 | 0 | 1 | 0 | 1 |
| Rzeszutek et al, 2024 | 0 | 0 | 0 | 1 | 1 | 1 | 1 | 0 | 0 |
| Schacht et al, 2010 | 0 | 1 | 1 | 0 | 1 | 1 | 1 | 0 | 0 |
| Schutze et al, 2020 | 0 | 1 | 1 | 0 | 1 | 0 | 1 | 0 | 1 |
| Schwartz & Drotar, 2006 | 0 | 1 | 1 | 1 | 1 | 1 | 1 | 0 | 1 |
| Somers et al, 2017 | 0 | 1 | 1 | 0 | 1 | 1 | 1 | 0 | 1 |
| Stein et al, 2022 | 0 | 1 | 1 | 0 | 0 | 1 | 1 | 0 | 0 |
| Talevi et al, 2018 | 0 | 1 | 1 | 0 | 1 | 1 | 0 | 0 | 1 |
| Teicher et al, 2015 | 0 | 1 | 1 | 0 | 1 | 1 | 1 | 1 | 1 |
| Thoma et al, 2020 | 0 | 1 | 1 | 1 | 1 | 1 | 1 | 0 | 1 |
| Turiano et al, 2017 | 0 | 1 | 1 | 0 | 1 | 0 | 1 | 0 | 0 |
| Upenieks & Liu, 2022 | 1 | 1 | 1 | 0 | 0 | 0 | 1 | 0 | 1 |
| Vartanian et al, 2014 | 0 | 1 | 1 | 0 | 1 | 1 | 1 | 0 | 1 |
| Vilete et al, 2014 | 1 | 1 | 1 | 0 | 0 | 1 | 1 | 1 | 0 |
| Volgenau et al (study 1), 2023 | 1 | 1 | 1 | 0 | 1 | 1 | 1 | 0 | 1 |
| Volgenau et al (study 2), 2023 | 1 | 1 | 1 | 0 | 1 | 1 | 1 | 0 | 1 |
| Wang et al, 2021 | 1 | 1 | 1 | 0 | 1 | 1 | 1 | 0 | 1 |
| Weilenmann et al, 2022 | 0 | 1 | 1 | 0 | 1 | 1 | 1 | 0 | 1 |
| Wendt et al, 2019 | 0 | 1 | 1 | 1 | 1 | 1 | 1 | 0 | 1 |
| Wooten et al, 2022 | 0 | 1 | 1 | 0 | 1 | 1 | 1 | 0 | 1 |
| Wu et al, 2018 | 0 | 1 | 1 | 0 | 1 | 1 | 1 | 0 | 1 |
| Xiang et al, 2021a | 1 | 1 | 1 | 0 | 1 | 1 | 1 | 0 | 1 |
| Xiang et al, 2021b | 0 | 1 | 1 | 0 | 1 | 1 | 1 | 0 | 1 |
| Yen et al, 2013 | 0 | 1 | 1 | 0 | 1 | 1 | 0 | 0 | 0 |
| Yu et al, 2020 | 0 | 1 | 1 | 0 | 1 | 1 | 1 | 0 | 1 |
| Zhang & Li, 2022 | 1 | 1 | 1 | 0 | 1 | 1 | 1 | 0 | 1 |
| Zhou et al, 2024 | 0 | 1 | 1 | 0 | 1 | 1 | 1 | 0 | 1 |

*Notes.* a Representative Sample: a sample drawn using a systematic or probabilistic sampling method that accurately mirrors the socio-demographic characteristics of the target population. Samples meeting this criterion are assigned a score of 1.

b Studies in which measures of ACEs were employed, which reported validity or fidelity analyses, were given a score of 1 at this criterion.

c Concurrent and convergent validity were considered for checklist measures.

d Concurrent and convergent validity were considered for PA measures

e Studies conducted on putatively non-clinical participants, including community/student samples, were given a score of 1 at this criterion.

f Studies in which the absence of psychopathology was not confirmed through an established structured clinical interview were given a score of 0 at this criterion.

g Studies in which the ACEs score was dichotomous (i.e., checklist questionnaires; continuous scores dichotomized based on a threshold) were given a score of 0 at this criterion.

**References included in the meta-analysis**

1 Alessandri, S. M. & Lewis, M. Differences in pride and shame in maltreated and nonmaltreated preschoolers. *Child development* **67**, 1857-1869, doi:10.1111/j.1467-8624.1996.tb01832.x (1996).

2 Alkhalaf, A. M. Measurement of parenting styles and their relationship to well-being in saudi arabia. *Int. J. Emerg. Ment. Health* **17**, 523-529, doi:10.4172/1522-4821.1000206 (2015).

3 Arslan, G. & Yildirim, M. Psychological maltreatment and loneliness in adolescents: Social ostracism and affective experiences. *Psychological Reports* **125**, 3028-3048, doi:10.1177/00332941211040430 (2022).

4 Arslan, G. Psychological maltreatment, social acceptance, social connectedness, and subjective well-being in adolescents. *J Happiness Stud* **19**, 983-1001, doi:10.1007/s10902-017-9856-z (2017).

5 Baugher, B. J., Delahanty, D. L. & Coifman, K. G. Recalled protective childhood experiences are associated with positive emotional expression in active-duty firefighters. *Journal of traumatic stress* **37**, 187-194, doi:10.1002/jts.22992 (2024).

6 Bendezu, J. J., Handley, E. D., Manly, J. T., Toth, S. L. & Cicchetti, D. Psychobiological foundations of coping and emotion regulation: Links to maltreatment and depression in a racially diverse, economically disadvantaged sample of adolescent girls. *Psychoneuroendocrinology* **143**, 105826, doi:10.1016/j.psyneuen.2022.105826 (2022).

7 Bonanno, G. A. *et al.* When the face reveals what words do not: Facial expressions of emotion, smiling, and the willingness to disclose childhood sexual abuse. *Journal of Personality and Social Psychology* **83**, 94-110, doi:10.1037/0022-3514.83.1.94 (2002).

8 Bradley, B., Davis, T. A., Wingo, A. P., Mercer, K. B. & Ressler, K. J. Family environment and adult resilience: Contributions of positive parenting and the oxytocin receptor gene. *Eur J Psychotraumato* **4**, doi:10.3402/ejpt.v4i0.21659 (2013).

9 Brick, L., Nugent, N. & Armey, M. Affective variability and childhood abuse increase the risk for nonsuicidal self-injury following psychiatric hospitalization. *Journal of traumatic stress* **34**, 1118-1131, doi:10.1002/jts.22739 (2021).

10 Brodski, S. K. & Hutz, C. S. The repercussions of emotional abuse and parenting styles on self-esteem, subjective well-being: A retrospective study with university students in brazil. *Journal of Aggression, Maltreatment & Trauma* **21**, 256-276, doi:10.1080/10926771.2012.666335 (2012).

11 Brunton, R. J. & Dryer, R. Intimate partner violence risk factors: A vulnerability-adaptation stress model approach. *J Interpers Violence* **39**, 3738-3763, doi:10.1177/08862605241234352 (2024).

12 Burton, S. *et al.* The mediating effects of parentification on the relation between parenting behavior and well-being and depressive symptoms in early adolescents. *Journal of Child and Family Studies* **27**, 4044-4059, doi:10.1007/s10826-018-1215-0 (2018).

13 Carlton, C. N. *et al.* From childhood maltreatment to adult inflammation: Evidence for the mediational status of social anxiety and low positive affect. *Brain, behavior, & immunity - health* **18**, 100366, doi:10.1016/j.bbih.2021.100366 (2021).

14 Cavazzoni, F., Fiorini, A., Shoman, H., Diab, M. & Veronese, G. The role of gender and living context in shaping palestinian children’s agency and well-being. *Gender Place Cult.* **29**, 222-247, doi:10.1080/0966369x.2021.1882954 (2022).

15 Cipriano, E. A., Skowron, E. A. & Gatzke-Kopp, L. M. Preschool children's cardiac reactivity moderates relations between exposure to family violence and emotional adjustment. *Child maltreatment* **16**, 205-215, doi:10.1177/1077559511408887 (2011).

16 Cohen, J. R., McNeil, S. & Menon, S. V. Childhood maltreatment and anhedonic symptoms: Test of a dual-risk model in emerging adults. *J Interpers Violence* **37**, NP7447-NP7469, doi:10.1177/0886260520969242 (2022).

17 Corcoran, M. & McNulty, M. Examining the role of attachment in the relationship between childhood adversity, psychological distress and subjective well-being. *Child abuse & neglect* **76**, 297-309, doi:10.1016/j.chiabu.2017.11.012 (2018).

18 Crandall, A. *et al.* Aces and counter-aces: How positive and negative childhood experiences influence adult health. *Child abuse & neglect* **96**, 104089, doi:10.1016/j.chiabu.2019.104089 (2019).

19 de Abreu, P. M. J., Kumsta, R. & Wealer, C. Risk and protective factors of mental health in children in residential care: A nationwide study from luxembourg. *Child abuse & neglect* **146**, 106522, doi:10.1016/j.chiabu.2023.106522 (2023).

20 DePierro, J., D'Andrea, W., Frewen, P. & Todman, M. Alterations in positive affect: Relationship to symptoms, traumatic experiences, and affect ratings. *Psychological Trauma: Theory, Research, Practice, and Policy* **10**, 585-593, doi:10.1037/tra0000317 (2018).

21 Dokuz, G., Kani, A. S., Uysal, O. & Kuscu, M. K. The impact of childhood trauma and daily life experiences on emotional and psychotic symptom intensity in psychosis: An experience sampling study. *Psychiatry research* **317**, 114872, doi:10.1016/j.psychres.2022.114872 (2022).

22 Drukker, M. *et al.* Network approach of mood and functional gastrointestinal symptom dynamics in relation to childhood trauma in patients with irritable bowel syndrome and comorbid panic disorder. *J Psychosom Res* **139**, 110261, doi:10.1016/j.jpsychores.2020.110261 (2020).

23 Erato, G., Shreffler, K. M., Ciciolla, L., Quigley, A. & Addante, S. Maternal childhood adversity and pregnancy intentions as predictors of pregnancy happiness. *Journal of Reproductive and Infant Psychology* **42**, 180-193, doi:10.1080/02646838.2022.2097208 (2024).

24 Etter, D. W., Gauthier, J. R., McDade-Montez, E., Cloitre, M. & Carlson, E. B. Positive affect, childhood adversity, and psychopathology in psychiatric inpatients. *Eur J Psychotraumato* **4**, doi:10.3402/ejpt.v4i0.20771 (2013).

25 Fillingim, R. B. & Edwards, R. R. Is self-reported childhood abuse history associated with pain perception among healthy young women and men? *Clin. J. Pain* **21**, 387-397, doi:10.1097/01.ajp.0000149801.46864.39 (2005).

26 Fitzgerald, M. & Berthiaume, K. A longitudinal investigation into marital quality as a mediator linking childhood abuse to affective symptoms. *The Journals of Gerontology: Series B* **76**, 2112-2120, doi:10.1093/geronb/gbab095 (2021).

27 Fitzgerald, M. & Esplin, J. A. Marital quality as a mechanism linking childhood abuse to mental health. *J. Fam. Issues* **44**, 1488-1507, doi:10.1177/0192513x211059831 (2022).

28 Frewen, P. A., Dean, J. A. & Lanius, R. A. Assessment of anhedonia in psychological trauma: Development of the hedonic deficit and interference scale. *Eur J Psychotraumato* **3**, doi:10.3402/ejpt.v3i0.8585 (2012).

29 Galea, M., Ciarrocchi, J. W., Piedmont, R. L. & Wicks, R. J. Child abuse, personality, and spirituality as predictors of happiness in maltese college students. *Res. Soc. Sci. Study Relig.* **18**, 141-154, doi:10.1163/ej.9789004158511.i-301.57 (2007).

30 George, W. H. *et al.* Sexual victimization, alcohol intoxication, sexual-emotional responding, and sexual risk in heavy episodic drinking women. *Arch Sex Behav* **43**, 645-658, doi:10.1007/s10508-013-0143-8 (2014).

31 Gratz, K. L. Risk factors for deliberate self-harm among female college students: The role and interaction of childhood maltreatment, emotional inexpressivity, and affect intensity/reactivity. *Am J Orthopsychiat* **76**, 238-250, doi:10.1037/0002-9432.76.2.238 (2006).

32 Greene, C. A. *et al.* Maternal socialization is associated with prosocial behavior in at-risk young children. *Vulnerable Child. Youth Stud.* **16**, 7-19, doi:10.1080/17450128.2020.1861399 (2021).

33 Grusnick, J. M., Garacci, E., Eiler, C., Williams, J. S. & Egede, L. E. The association between adverse childhood experiences and personality, emotions and affect: Does number and type of experiences matter? *Journal of research in personality* **85**, doi:10.1016/j.jrp.2019.103908 (2020).

34 Guhn, A., Sterzer, P., Haack, F. H. & Kohler, S. Affective and cognitive reactivity to mood induction in chronic depression. *Journal of affective disorders* **229**, 275-281, doi:10.1016/j.jad.2017.12.090 (2018).

35 Han, J. *et al.* Adolescent's anhedonia and association with childhood trauma among chinese adolescents: A cross-sectional study. *Bmj Open* **13**, e071521, doi:10.1136/bmjopen-2022-071521 (2023).

36 Hasmi, L. *et al.* Network approach to understanding emotion dynamics in relation to childhood trauma and genetic liability to psychopathology: Replication of a prospective experience sampling analysis. *Front Psychol* **8**, 1908, doi:10.3389/fpsyg.2017.01908 (2017).

37 Hauber, D., Kaspar, R. & Zank, S. Wwii traumatic events, subjective well-being and valuation of life in the very old. *Zeitschrift fur Gerontologie und Geriatrie* **54**, 126-131, doi:10.1007/s00391-021-01906-7 (2021).

38 Hautle, L. L. *et al.* Individuals with and without child maltreatment experiences are evaluated similarly and do not differ in facial affect display at zero- and first-acquaintance. *Border Pers Dis Emot* **10**, 17, doi:10.1186/s40479-023-00222-3 (2023).

39 Heshmati, R., Haghi, N. & Brownridge, D. A. Pathways linking childhood maltreatment to impulsivity: The mediating role of affect balance. *Journal of Aggression, Maltreatment & Trauma* **30**, 991-1006, doi:10.1080/10926771.2021.1933289 (2021).

40 Holzman, J. B., Burt, N. M., Edwards, E. S., Rosinski, L. D. & Bridgett, D. J. Negative (but not positive) parenting interacts with infant negative affect to predict infant approach: Evidence of diathesis-stress. *Infancy : the official journal of the International Society on Infant Studies* **23**, 471-480, doi:10.1111/infa.12223 (2018).

41 Iffland, B., Sansen, L. M., Catani, C. & Neuner, F. The trauma of peer abuse: Effects of relational peer victimization and social anxiety disorder on physiological and affective reactions to social exclusion. *Frontiers in psychiatry* **5**, 26, doi:10.3389/fpsyt.2014.00026 (2014).

42 Infurna, F. J., Rivers, C. T., Reich, J. & Zautra, A. J. Childhood trauma and personal mastery: Their influence on emotional reactivity to everyday events in a community sample of middle-aged adults. *PloS one* **10**, e0121840, doi:10.1371/journal.pone.0121840 (2015).

43 Infurna, F. J. *et al.* The dynamics of daily life in custodial grandmothers. *The Journals of Gerontology: Series B* **78**, 456-468, doi:10.1093/geronb/gbac141 (2023).

44 Ion, A. *et al.* Childhood maltreatment and emotion regulation in everyday life: An experience sampling study. *Scientific Reports* **13**, 7214, doi:10.1038/s41598-023-34302-9 (2023).

45 Jackson, J. L., Calhoun, K. S., Amick, A. E., Maddever, H. M. & Habif, V. L. Young adult women who report childhood intrafamilial sexual abuse: Subsequent adjustment. *Arch Sex Behav* **19**, 211-221, doi:10.1007/BF01541547 (1990).

46 Jeon, M. S. & Bae, E. B. Emotions and sensory processing in adolescents: The effect of childhood traumatic experiences. *J Psychiatr Res* **151**, 136-143, doi:10.1016/j.jpsychires.2022.03.054 (2022).

47 Jerud, A. B., Zoellner, L. A., Pruitt, L. D. & Feeny, N. C. Changes in emotion regulation in adults with and without a history of childhood abuse following posttraumatic stress disorder treatment. *Journal of consulting and clinical psychology* **82**, 721-730, doi:10.1037/a0036520 (2014).

48 Julian, M. M. *et al.* Associations between oxytocin receptor gene (oxtr) polymorphisms, childhood trauma, and parenting behavior. *Developmental psychology* **55**, 2135-2146, doi:10.1037/dev0000783 (2019).

49 Jung, J. H. Childhood adversity, religion, and change in adult mental health. *Res. Aging* **40**, 155-179, doi:10.1177/0164027516686662 (2018).

50 Kelifa, M. O., Yang, Y., Carly, H., Bo, W. & Wang, P. How adverse childhood experiences relate to subjective wellbeing in college students: The role of resilience and depression. *J Happiness Stud* **22**, 2103-2123, doi:10.1007/s10902-020-00308-7 (2020).

51 Kim, S., Han, Y. & Ma, J. Profiles of adverse childhood experiences (aces) and psychosocial adjustment in south korea: Comparison between probation and non-probation youth. *Child abuse & neglect* **146**, 106453, doi:10.1016/j.chiabu.2023.106453 (2023).

52 Koenig, A. L., Cicchetti, D. & Rogosch, F. A. Child compliance/noncompliance and maternal contributors to internalization in maltreating and nonmaltreating dyads. *Child development* **71**, 1018-1032, doi:10.1111/1467-8624.00206 (2000).

53 Kong, F. *et al.* Childhood emotional but not physical or sexual maltreatment predicts prosocial behavior in late adolescence: A daily diary study. *Child abuse & neglect* **139**, 106123, doi:10.1016/j.chiabu.2023.106123 (2023).

54 Krijnen, L. J. G. *et al.* Factors associated with mental health of young children during the covid-19 pandemic in the netherlands. *Child and Adolescent Psychiatry and Mental Health* **17**, 136, doi:10.1186/s13034-023-00686-9 (2023).

55 Kumar, A., Deb, S. & Bhagyalakshmi, K. C. Impact of abuse on mental health and happiness among students: Mediating role of family environment. *Journal of Indian Association for Child and Adolescent Mental Health* **19**, 266-272, doi:10.1177/09731342231217075 (2023).

56 Kuzminskaite, E. *et al.* Day-to-day affect fluctuations in adults with childhood trauma history: A two-week ecological momentary assessment study. *Psychological medicine* **54**, 1160-1171, doi:10.1017/S0033291723002969 (2024).

57 Kwok, S., Jiang, J. & Fang, S. Presence of meaning in life and meaning confusion mediate the effects of adverse childhood experiences on mental health among university students. *Applied psychology. Health and well-being* **16**, 179-197, doi:10.1111/aphw.12478 (2024).

58 Labella, M. H. *et al.* Parental affect profiles predict child emotion regulation and classroom adjustment in families experiencing homelessness. *Soc Dev* **32**, 830-848, doi:10.1111/sode.12667 (2023).

59 LaNoue, M., Graeber, D. A., Helitzer, D. L. & Fawcett, J. Negative affect predicts adults' ratings of the current, but not childhood, impact of adverse childhood events. *Community Ment. Health J.* **49**, 560-566, doi:10.1007/s10597-012-9511-4 (2013).

60 Lazić, M., Jovanović, V. & Gavrilov-Jerković, V. The role of perceived negative childhood experiences in the context of recent stress: Testing competing theoretical models. *Current Psychology* **42**, 116-125, doi:10.1007/s12144-021-01418-y (2021).

61 Lehto, K. *et al.* Childhood adoption and mental health in adulthood: The role of gene-environment correlations and interactions in the uk biobank. *Biological psychiatry* **87**, 708-716, doi:10.1016/j.biopsych.2019.10.016 (2020).

62 Li, Q. & Xiang, Y. How is childhood maltreatment linked to benign envy/malicious envy? The mediating role of self-esteem, authentic pride and hubristic pride. *Personal Ment Health* **14**, 376-387, doi:10.1002/pmh.1492 (2020).

63 Liu, A., Wang, W. & Wu, X. Understanding the relation between self-compassion and suicide risk among adolescents in a post-disaster context: Mediating roles of gratitude and posttraumatic stress disorder. *Front Psychol* **11**, 1541, doi:10.3389/fpsyg.2020.01541 (2020).

64 Liu, J., Li, B., Xu, M., Luo, J. & Li, X. Effects of childhood maltreatment on prosocial behaviors among chinese emerging adults: A mediated moderation model of psychological suzhi and gratitude. *Child Youth Serv Rev* **132**, doi:10.1016/j.childyouth.2021.106334 (2022).

65 Liu, P. *et al.* Maternal depression, child temperament, and early-life stress predict never-depressed preadolescents’ functional connectivity during a negative-mood induction. *Clinical Psychological Science* **10**, 141-160, doi:10.1177/21677026211016419 (2021).

66 Luterek, J. A., Orsillo, S. M. & Marx, B. P. An experimental examination of emotional experience, expression, and disclosure in women reporting a history of childhood sexual abuse. *Journal of traumatic stress* **18**, 237-244, doi:10.1002/jts.20027 (2005).

67 McQuarrie, A. M., Smith, S. D. & Jakobson, L. S. Alexithymia and sensory processing sensitivity account for unique variance in the prediction of emotional contagion and empathy. *Front Psychol* **14**, 1072783, doi:10.3389/fpsyg.2023.1072783 (2023).

68 Mezquita, L., Ibanez, M. I., Moya, J., Villa, H. & Ortet, G. A longitudinal examination of different etiological pathways to alcohol use and misuse. *Alcohol Clin Exp Res* **38**, 1770-1779, doi:10.1111/acer.12419 (2014).

69 Michels, N. *et al.* Stress, emotional eating behaviour and dietary patterns in children. *Appetite* **59**, 762-769, doi:10.1016/j.appet.2012.08.010 (2012).

70 Michels, N. *et al.* Negative life events, emotions and psychological difficulties as determinants of salivary cortisol in belgian primary school children. *Psychoneuroendocrinology* **37**, 1506-1515, doi:10.1016/j.psyneuen.2012.02.004 (2012).

71 Morelen, D., Menke, R., Rosenblum, K. L., Beeghly, M. & Muzik, M. Understanding bidirectional mother-infant affective displays across contexts: Effects of maternal maltreatment history and postpartum depression and ptsd symptoms. *Psychopathology* **49**, 305-314, doi:10.1159/000448376 (2016).

72 Nayman, S., Jones, E. J., Smyth, J. M. & Schreier, H. M. C. Associations of childhood and adult adversity with daily experiences in adulthood. *Stress Health* **38**, 318-329, doi:10.1002/smi.3090 (2022).

73 Nayman, S., Schricker, I. F., Reinhard, I. & Kuehner, C. Childhood adversity predicts stronger premenstrual mood worsening, stress appraisal and cortisol decrease in women with premenstrual dysphoric disorder. *Frontiers in endocrinology* **14**, 1278531, doi:10.3389/fendo.2023.1278531 (2023).

74 Nguyen-Feng, V. N., Romano, F. N. & Frazier, P. Emotional abuse moderates efficacy of an ecological momentary stress management intervention for college students. *Journal of Counseling Psychology* **66**, 461-472, doi:10.1037/cou0000332 (2019).

75 Nishimi, K. *et al.* Measures of adult psychological resilience following early-life adversity: How congruent are different measures? *Psychological medicine* **51**, 2637-2646, doi:10.1017/S0033291720001191 (2021).

76 Nishimi, K. M., Koenen, K. C., Coull, B. A. & Kubzansky, L. D. Association of psychological resilience with healthy lifestyle and body weight in young adulthood. *J Adolescent Health* **70**, 258-266, doi:10.1016/j.jadohealth.2021.08.006 (2022).

77 Oltean, L.-E., Miu, A. C., Șoflău, R. & Szentágotai-Tătar, A. Tailoring gratitude interventions. How and for whom do they work? The potential mediating role of reward processing and the moderating role of childhood adversity and trait gratitude. *J Happiness Stud* **23**, 3007-3030, doi:10.1007/s10902-022-00530-5 (2022).

78 Oshio, T., Umeda, M. & Kawakami, N. Childhood adversity and adulthood subjective well-being: Evidence from japan. *J Happiness Stud* **14**, 843-860, doi:10.1007/s10902-012-9358-y (2013).

79 Paetzold, I. *et al.* Stress reactivity as a putative mechanism linking childhood trauma with clinical outcomes in individuals at ultra-high-risk for psychosis: Findings from the eu-gei high risk study. *Epidemiol. Psychiatr. Sci.* **30**, e40, doi:10.1017/S2045796021000251 (2021).

80 Pole, N. *et al.* Associations between childhood trauma and emotion-modulated psychophysiological responses to startling sounds: A study of police cadets. *Journal of abnormal psychology* **116**, 352-361, doi:10.1037/0021-843X.116.2.352 (2007).

81 Ponnamperuma, T. Validation of the long-term difficulties questionnaire-youth version as a measure of chronic stress in adolescents in sri lanka. *WHO South-East Asia journal of public health* **11**, 71-78, doi:10.4103/WHO-SEAJPH.WHO-SEAJPH_199_21 (2022).

82 Pries, L. K. *et al.* Polygenic liability for schizophrenia and childhood adversity influences daily-life emotion dysregulation and psychosis proneness. *Acta psychiatrica Scandinavica* **141**, 465-475, doi:10.1111/acps.13158 (2020).

83 Raney, J. H. *et al.* Mental well-being among adversity-exposed adolescents during the covid-19 pandemic. *Jama Netw Open* **7**, e242076, doi:10.1001/jamanetworkopen.2024.2076 (2024).

84 Riley, F., Wright, M., Bokszczanin, A. & Essau, C. A. Poly-victimization in polish adolescents: Risk factors and the moderating role of coping. *J Interpers Violence* **35**, 1515-1538, doi:10.1177/0886260517696868 (2020).

85 Robinson, L. R. *et al.* Relations between emotion regulation, parenting, and psychopathology in young maltreated children in out of home care. *Journal of Child and Family Studies* **18**, 421-434, doi:10.1007/s10826-008-9246-6 (2009).

86 Roche-Miranda, M. I., Subervi-Vazquez, A. M. & Martinez, K. G. Ataque de nervios: The impact of sociodemographic, health history, and psychological dimensions on puerto rican adults. *Frontiers in psychiatry* **14**, 1013314, doi:10.3389/fpsyt.2023.1013314 (2023).

87 Rose, H., Womick, J. & King, L. A. Purpose maintained: Adverse childhood experiences and meaning in life. *Journal of personality* **91**, 1425-1441, doi:10.1111/jopy.12820 (2023).

88 Rzeszutek, M. *et al.* Profiles of posttraumatic stress disorder (ptsd), complex posttraumatic stress disorder (cptsd), and subjective well-being in a sample of adult children of alcoholics. *Psychological trauma: theory, research, practice, and policy* **16**, S143-S151, doi:10.1037/tra0001211 (2024).

89 Schacht, R. L. *et al.* Sexual abuse history, alcohol intoxication, and women's sexual risk behavior. *Arch Sex Behav* **39**, 898-906, doi:10.1007/s10508-009-9544-0 (2010).

90 Schutze, I., Geraedts, K. & Leeners, B. The association between adverse childhood experiences and quality of partnership in adult women. *Child abuse & neglect* **108**, 104653, doi:10.1016/j.chiabu.2020.104653 (2020).

91 Schwartz, L. & Drotar, D. Posttraumatic stress and related impairment in survivors of childhood cancer in early adulthood compared to healthy peers. *J Pediatr Psychol* **31**, 356-366, doi:10.1093/jpepsy/jsj018 (2006).

92 Somers, J. A., Ibrahim, M. H. & Luecken, L. J. Biological sensitivity to the effects of childhood family adversity on psychological well-being in young adulthood. *Child maltreatment* **22**, 236-244, doi:10.1177/1077559517711041 (2017).

93 Stein, S. F. *et al.* Predictors of intimate partner violence victimization by multiple partners over a period of 8 years. *Journal of traumatic stress* **35**, 222-234, doi:10.1002/jts.22723 (2022).

94 Talevi, D. *et al.* Interpersonal violence: Identification of associated features in a clinical sample. *Child abuse & neglect* **86**, 349-357, doi:10.1016/j.chiabu.2018.08.017 (2018).

95 Teicher, M. H., Ohashi, K., Lowen, S. B., Polcari, A. & Fitzmaurice, G. M. Mood dysregulation and affective instability in emerging adults with childhood maltreatment: An ecological momentary assessment study. *J Psychiatr Res* **70**, 1-8, doi:10.1016/j.jpsychires.2015.08.012 (2015).

96 Thoma, M. V., Holtge, J., Eising, C. M., Pfluger, V. & Rohner, S. L. Resilience and stress in later life: A network analysis approach depicting complex interactions of resilience resources and stress-related risk factors in older adults. *Front Behav Neurosci* **14**, 580969, doi:10.3389/fnbeh.2020.580969 (2020).

97 Turiano, N. A., Silva, N. M., McDonald, C. & Hill, P. L. Retrospective reports of childhood misfortune are associated with positive and negative affect in adulthood. *International journal of aging & human development*, 91415016688480, doi:10.1177/0091415016688480 (2017).

98 Upenieks, L. & Liu, Y. Marital strain and support and subjective well-being in later life: Ascribing a role to childhood adversity. *Journal of Aging and Health* **34**, 550-568, doi:10.1177/08982643211048664 (2022).

99 Vartanian, L. R., Smyth, J. M., Zawadzki, M. J., Heron, K. E. & Coleman, S. R. Early adversity, personal resources, body dissatisfaction, and disordered eating. *Int J Eat Disorder* **47**, 620-629, doi:10.1002/eat.22313 (2014).

100 Vilete, L. *et al.* Resilience to trauma in the two largest cities of brazil: A cross-sectional study. *BMC psychiatry* **14**, 257, doi:10.1186/s12888-014-0257-0 (2014).

101 Volgenau, K. M., Hokes, K. E., Hacker, N. & Adams, L. M. A network analysis approach to understanding the relationship between childhood trauma and wellbeing later in life. *Child Psychiat Hum D* **54**, 1127-1140, doi:10.1007/s10578-022-01321-y (2023).

102 Wang, P., Kelifa, M. O., Yu, B. & Yang, Y. Classes of childhood adversities and their associations to the mental health of college undergraduates: A nationwide cross-sectional study. *Environ. Health Prev. Med.* **26**, 73, doi:10.1186/s12199-021-00993-7 (2021).

103 Weilenmann, S. *et al.* Experimental induction of emotional and sexual intimacy: Exploring the validity of the german fast friends procedure in individuals with and without childhood maltreatment. *Arch Sex Behav* **51**, 1703-1719, doi:10.1007/s10508-021-02081-x (2022).

104 Wendt, G. W. *et al.* Stressful events, life satisfaction, and positive and negative affect in youth at risk. *Child Youth Serv Rev* **102**, 34-41, doi:10.1016/j.childyouth.2019.04.028 (2019).

105 Wooten, W., Laubaucher, C., George, G. C., Heyn, S. & Herringa, R. J. The impact of childhood maltreatment on adaptive emotion regulation strategies. *Child abuse & neglect* **125**, 105494, doi:10.1016/j.chiabu.2022.105494 (2022).

106 Wu, Q., Chi, P., Lin, X. & Du, H. Child maltreatment and adult depressive symptoms: Roles of self-compassion and gratitude. *Child abuse & neglect* **80**, 62-69, doi:10.1016/j.chiabu.2018.03.013 (2018).

107 Xiang, Y., Chen, D. & Zhao, J. How is childhood abuse associated with moral disgust? The mediating role of social support and gratitude——based on the theory of mind. *Journal of Aggression, Maltreatment & Trauma* **30**, 1028-1040, doi:10.1080/10926771.2020.1806974 (2021).

108 Xiang, Y., Yuan, R. & Zhao, J. Childhood maltreatment and life satisfaction in adulthood: The mediating effect of emotional intelligence, positive affect and negative affect. *Journal of Health Psychology* **26**, 2460-2469, doi:10.1177/1359105320914381 (2021).

109 Yen, S. *et al.* Prospective predictors of adolescent suicidality: 6-month post-hospitalization follow-up. *Psychological medicine* **43**, 983-993, doi:10.1017/S0033291712001912 (2013).

110 Yu, G., Li, S. & Zhao, F. Childhood maltreatment and prosocial behavior among chinese adolescents: Roles of empathy and gratitude. *Child abuse & neglect* **101**, 104319, doi:10.1016/j.chiabu.2019.104319 (2020).

111 Zhang, H. & Li, Y. Child neglect and life satisfaction among left-behind children in rural china: The roles of self-compassion and gratitude. *J Interpers Violence* **37**, NP15649-NP15669, doi:10.1177/08862605211016348 (2022).

112 Zhou, H. Y. *et al.* Unraveling the link between childhood maltreatment and depression: Insights from the role of ventral striatum and middle cingulate cortex in hedonic experience and emotion regulation. *Development and psychopathology* **37**, 292-302, doi:10.1017/S0954579423001591 (2024).
